# Supplementary material for: Physiology and ecology combine to determine host and vector importance for Ross River virus
Source: eLife journal article supplement (doi:10.7554/elife.67018), 2021-08-20
Supplement: supp [file elife-67018-supp-v1.zip]

Archive with 12 entries (12 files):
- elife_poa_e67018_Supplementary_file_1.docx
- elife_poa_e67018_Supplementary_file_2.docx
- elife_poa_e67018_Supplementary_file_3.docx
- elife_poa_e67018_Transparent_Reporting_File.pdf
- elife_poa_e67018_Source_data_1.csv
- elife_poa_e67018_Source_data_2.csv
- elife_poa_e67018_Source_data_3.csv
- elife_poa_e67018_Source_data_4.csv
- elife_poa_e67018_Source_data_5.csv
- elife_poa_e67018_Source_data_6.csv
- elife_poa_e67018_Source_data_7.csv
- elife_poa_e67018_Source_data_8.csv
