# Supplementary material for: Physiology and ecology combine to determine host and vector importance for Ross River virus
Source: eLife journal article supplement (doi:10.7554/elife.67018), 2021-08-20
Supplement: supp [file elife-67018-supp-v1.zip › elife_poa_e67018_Source_data_1.csv]

host	infected.dose	total.tested	peak.titre	unit	sd.titre	titre.duration.hours	titre.duration.days	sd.duration	perc.viraemic	num.viraemic	perc.antibody	ref	note
brushtail_possum	3.5	10	8.5	CCID50	1.6	72	3	1.5	33	3	80	Boyd & Kay 2001	peak titre and duration reported in text, sd's taken from figures. Additional information: a) We don't actually know the infective dose. What is provided is the titer of the mosquito, not the dose the mosquito inoculated whilst blood feeding. b) Peak titer has been converted to per mL (it was originally per 100 uL). The SD values will have to be changed to reflect this (i.e. should be 2.6 CCID50/…
agile_wallaby	4.5	9	5.6	SMIC50	2.4	81.6	3.4	1.1	78	7	100	Kay et al. 1986	See comment in notes re: Boyd et al. 2001 re: titer of virus inoculated. Also, all viraemia titres are SMICD50/mL
grey_kangaroo	4.5	3	4.6	SMIC50	2	144	6	0	100	3	100	Kay et al. 1986	See comment in notes re: Boyd et al. 2001 re: titer of virus inoculated. Also, all viraemia titres are SMICD50/mL
bandicoot	3.2	4	7.2	LD50	0	144	6	0	100	4	100	Whitehead 1969	assumption: all individuals were positive, no sd given
marsupial_mouse	2.2	6	8	LD50	0	144	6	0	100	6	100	Whitehead 1969	assumption: all individuals were positive, no sd given
horse	4.5	11	6.3	SMIC50	0	96	4	0	10	1	60	Kay et al. 1986	See comment in notes re: Boyd et al. 2001 re: titer of virus inoculated. Also, all viraemia titres are SMICD50/mL
sheep	4.5	8	3.8	SMIC50	1	57.6	2.4	1.1	100	8	100	Kay et al. 1986	See comment in notes re: Boyd et al. 2001 re: titer of virus inoculated. Also, all viraemia titres are SMICD50/mL
sheep	6.5	4	3.3	LD50	2.16	120	5	0.7	100	4	100	Spradbrow 1973	SD's estimated from the text. Note that only 4 sheep were inoculated with this titre. As far as I can make out it is 3.3 LOG/mL of viraemia. They state that viraemia never went above this titre. The duration of viramia differed between sheep with a maximum duration of 5 days. So, you'll need to recalculate the values.
sheep	5	3	0	LD50	0	0	0	0	0	0	0	Spradbrow 1974	This information is new…the author states that there was no evidence of viraemia.
sheep	NA	5	5	LD50	0	48	2	0.5	100	5	NA		1-3 days of titer duration given. Made the simple assumption to convert to mean of 2 with SD of 0.5.
pig	4.5	11	3	SMIC50	1	81.6	3.4	1.6	91	10	45	Kay et al. 1986	See comment in notes re: Boyd et al. 2001 re: titer of virus inoculated. Also, all viraemia titres are SMICD50/mL
pig	5	3	3	LD50	2.16	48	2	0.7	100	3	100	Spradbrow 1973	SD's estimated from the text. As far as I can make out, the titre of the viraemia is 3.0 LD50/mL
cow	4.5	6	2.3	SMIC50	0	48	2	0	16	1	16	Kay et al. 1986	See comment in notes re: Boyd et al. 2001 re: titer of virus inoculated. Also, all viraemia titres are SMICD50/mL
cat	3.5	10	0	CCID50	0	0	0	0	0	0	10	Boyd & Kay 2002	See comment in notes re: Boyd et al. 2001 re: titer of virus inoculated.
dog	3.5	10	0	CCID50	0	0	0	0	0	0	10	Boyd & Kay 2002	See comment in notes re: Boyd et al. 2001 re: titer of virus inoculated.
grey_h_f_fox	6.9	10	2.2	TCID50	0	96	4	2.4	25	3	33	Ryan et al. 1997	See comment in notes re: Boyd et al. 2001 re: titer of virus inoculated. This is not really a peak viraemia, It is the limit of detection of the assay (which is 3.2 LOG TCID50/mL). So, using the virus content of a blood fed mosquito as a way to measure viraemia showed that all were negative (i.e. titres less than 3.2 LOG TCID50/mL), but we don't know what their titres were, even if they had a low…
rat	2.2	4	7.4	LD50	0	72	3	0	0	4	100	Whitehead 1969	assumption: all individuals were positive, no sd given
rabbit	4.5	9	3.1	SMIC50	0.3	55.2	2.3	0.5	67	6	0	Kay et al. 1986	See comment in notes re: Boyd et al. 2001 re: titer of virus inoculated. Also, all viraemia titres are SMICD50/mL
rabbit	3.2	4	4.7	LD50	0	48	2	0	0	4	100	Whitehead 1969	assumption: all individuals were positive, no sd given
chicken	4.5	20	2.8	SMIC50	0.9	69.6	2.9	1	95	19	55	Kay et al. 1986	See comment in notes re: Boyd et al. 2001 re: titer of virus inoculated. Also, all viraemia titres are SMICD50/mL
chicken	5.7	16	5	SMIC50	0	120	5	0	18.75	3	75	Whitehead 1969	assumption: all individuals were positive, no sd given. Note that these were chicks
chicken	2.6	16	5	SMIC50	0	120	5	0	18.75	3	75	Whitehead 1969	assumption: all individuals were positive, no sd given. Note these were adults.
black_duck	4.5	3	1.8	SMIC50	2.1	96	4	1.4	67	2	100	Kay et al. 1986	See comment in notes re: Boyd et al. 2001 re: titer of virus inoculated. Also, all viraemia titres are SMICD50/mL. Unclear how SD can be larger than the peak. Not enough info given in the paper to understand this
little_corella	4.5	12	2.3	SMIC50	0.1	50.4	2.1	1.1	50	6	0	Kay et al. 1986	See comment in notes re: Boyd et al. 2001 re: titer of virus inoculated. Also, all viraemia titres are SMICD50/mL
