# Supplementary material for: Physiology and ecology combine to determine host and vector importance for Ross River virus
Source: eLife journal article supplement (doi:10.7554/elife.67018), 2021-08-20
Supplement: supp [file elife-67018-supp-v1.zip › elife_poa_e67018_Source_data_2.csv]

host	num_pos	num_tested	titre	day	titre_unit	ref
human	6	14	4.9	0	LD50	rosen 1981
human	22	39	4.4	1	LD50	rosen 1981
human	13	23	4	2	LD50	rosen 1981
human	4	12	3.9	3	LD50	rosen 1981
human	2	6	4.9	4	LD50	rosen 1981
human	1	3	2.5	6	LD50	rosen 1981
human	1	5	4.2	7	LD50	rosen 1981
