# Supplementary material for: Physiology and ecology combine to determine host and vector importance for Ross River virus
Source: eLife journal article supplement (doi:10.7554/elife.67018), 2021-08-20
Supplement: supp [file elife-67018-supp-v1.zip › elife_poa_e67018_Source_data_3.csv]

species	genus	RRV_isolate	infectious.dose	perc.infected	unit	total.infect.exp	temp	day	ref
ae_aegypti	aedes	T48	7.5	89	PFU	39	27		Ballard & Marshall 1986
ae_aegypti	aedes	T48	6.4	31	PFU	67	27		Ballard & Marshall 1986
ae_aegypti	aedes	T48	5.5	31	PFU	55	27		Ballard & Marshall 1986
ae_aegypti	aedes	T48	4.6	15	PFU	45	27		Ballard & Marshall 1986
ae_aegypti	aedes	T48	5.9	100	SMIC	9	27		Kay et al 1979
ae_alternans	aedes	5962	4.2	100	TCID50	2	27	1	Wells et al 1994
ae_alternans	aedes	5962	4.2	33	TCID50	3	27	6	Wells et al 1994
ae_alternans	aedes	5962	4.2	83	TCID50	6	27	10	Wells et al 1994
ae_alternans	aedes	5962	5.2	75	TCID50	4	27	1	Wells et al 1994
ae_alternans	aedes	5962	5.2	67	TCID50	3	27	3	Wells et al 1994
ae_alternans	aedes	5962	5.2	40	TCID50	5	27	6	Wells et al 1994
ae_alternans	aedes	5962	5.2	100	TCID50	3	27	8	Wells et al 1994
ae_alternans	aedes	5962	5.2	67	TCID50	15	27	10	Wells et al 1994
ae_alternans	aedes	5962	6.2	50	TCID50	4	27	1	Wells et al 1994
ae_alternans	aedes	5962	6.2	100	TCID50	4	27	3	Wells et al 1994
ae_alternans	aedes	5962	6.2	100	TCID50	1	27	6	Wells et al 1994
ae_alternans	aedes	5962	6.2	100	TCID50	6	27	10	Wells et al 1994
ae_camptorhynchus	aedes	T48	7.5	100	PFU	1	27	14	Ballard & Marshall 1986
ae_camptorhynchus	aedes	T48	6.8	89	PFU	9	27	14	Ballard & Marshall 1986
ae_camptorhynchus	aedes	T48	6.4	100	PFU	6	27	14	Ballard & Marshall 1986
ae_camptorhynchus	aedes	T48	5.9	100	PFU	4	27	14	Ballard & Marshall 1986
ae_camptorhynchus	aedes	T48	5.5	67	PFU	6	27	14	Ballard & Marshall 1986
ae_camptorhynchus	aedes	T48	4.6	17	PFU	6	27	14	Ballard & Marshall 1986
ae_multiplex	aedes	RR553	3.7	0	CCID50	45	28	10	Ryan, Do, Kay 2000
ae_multiplex	aedes	RR553	4.7	3	CCID50	30	28	10	Ryan, Do, Kay 2000
ae_multiplex	aedes	B94/20	5.7	0	CCID50	9	28	10	Ryan, Do, Kay 2000
ae_multiplex	aedes	RR553	6.7	3	CCID50	59	28	10	Ryan, Do, Kay 2000
ae_multiplex	aedes	B94/20	7.7	15	CCID50	8	28	10	Ryan, Do, Kay 2000
ae_multiplex	aedes	RR553	4.2	57	CCID50	44	28	10	Ryan, Do, Kay 2000
ae_multiplex	aedes	B94/20	5.2	58	CCID50	150	28	10	Ryan, Do, Kay 2000
ae_notoscriptus	aedes	RR5962	6.7	70	TCID50	10	25	3	Doggett & Russell 1997
ae_notoscriptus	aedes	RR5962	6.7	50	TCID50	10	25	5	Doggett & Russell 1997
ae_notoscriptus	aedes	RR5962	6.7	50	TCID50	10	25	7	Doggett & Russell 1997
ae_notoscriptus	aedes	RR5962	6.7	70	TCID50	10	25	9	Doggett & Russell 1997
ae_notoscriptus	aedes	RR5962	6.7	40	TCID50	10	25	11	Doggett & Russell 1997
ae_notoscriptus	aedes	RR5962	6.7	50	TCID50	10	25	13	Doggett & Russell 1997
ae_notoscriptus	aedes	RR5962	6.7	0	TCID50	2	25	15	Doggett & Russell 1997
ae_notoscriptus	aedes	RR2186	6.6	100	TCID50	10	25	3	Doggett & Russell 1997
ae_notoscriptus	aedes	RR2186	6.6	100	TCID50	10	25	5	Doggett & Russell 1997
ae_notoscriptus	aedes	RR2186	6.6	100	TCID50	10	25	7	Doggett & Russell 1997
ae_notoscriptus	aedes	RR2186	6.6	70	TCID50	10	25	9	Doggett & Russell 1997
ae_notoscriptus	aedes	RR2186	6.6	90	TCID50	10	25	11	Doggett & Russell 1997
ae_notoscriptus	aedes	RR2186	6.6	100	TCID50	10	25	13	Doggett & Russell 1997
ae_notoscriptus	aedes	RR2186	6.6	100	TCID50	6	25	15	Doggett & Russell 1997
ae_notoscriptus	aedes	RR1693	4.5	0	CCID50	22	28	10	Ryan, Do, Kay 2000
ae_notoscriptus	aedes	RR1693	5.5	20	CCID50	54	28	10	Ryan, Do, Kay 2000
ae_notoscriptus	aedes	B94/20	5.7	15	CCID50	22	28	10	Ryan, Do, Kay 2000
ae_notoscriptus	aedes	RR1693	6.5	36	CCID50	14	28	12	Ryan, Do, Kay 2000
ae_notoscriptus	aedes	RR1693	6.5	35	CCID50	21	28	10	Ryan, Do, Kay 2000
ae_notoscriptus	aedes	B94/20	6.7	60	CCID50	63	28	10	Ryan, Do, Kay 2000
ae_notoscriptus		B94/20	7.7	90	CCID50	10	28	7	Ryan, Do, Kay 2000
ae_notoscriptus		B94/20	7.7	85	CCID50	13	28	10	Ryan, Do, Kay 2000
ae_notoscriptus		B94/20	7.7	65	CCID50	106	28	10	Ryan, Do, Kay 2000
ae_notoscriptus	aedes	B94/20	3.5	0	CCID50	28	25	9	Watson & Kay 1998
ae_notoscriptus	aedes	B94/20	4.5	5	CCID50	43	25	9	Watson & Kay 1998
ae_notoscriptus	aedes	B94/20	6	63	CCID50	30	25	9	Watson & Kay 1998
ae_notoscriptus	aedes	B94/20	7.5	85	CCID50	110	25	9	Watson & Kay 1998
ae_notoscriptus	aedes	B94/20	7.5	76	CCID50	21	25	4	Watson & Kay 1998
ae_notoscriptus	aedes	B94/20	7.5	82	CCID50	22	25	5	Watson & Kay 1998
ae_notoscriptus	aedes	B94/20	7.5	80	CCID50	15	25	7	Watson & Kay 1998
ae_notoscriptus	aedes	B94/20	7.5	93	CCID50	15	25	9	Watson & Kay 1998
ae_notoscriptus	aedes	B94/20	7.5	87	CCID50	15	25	12	Watson & Kay 1998
ae_notoscriptus	aedes	B94/20	7.5	100	CCID50	15	25	14	Watson & Kay 1998
ae_notoscriptus	aedes	B94/20	7.5	71	CCID50	7	25	17	Watson & Kay 1998
ae_procax	aedes	B94/20	5.7	30	CCID50	40	28	10	Ryan, Do, Kay 2000
ae_procax	aedes	B94/20	6.7	90	CCID50	21	28	10	Ryan, Do, Kay 2000
ae_procax	aedes	B94/20	7.7	95	CCID50	133	28	10	Ryan, Do, Kay 2000
ae_procax	aedes	B94/20	7.7	98	CCID50	49	28	9	Ryan, Do, Kay 2000
ae_procax	aedes	B94/20	7.7	100	CCID50	16	28	19	Ryan, Do, Kay 2000
ae_vigilax	aedes	B94/20	4.2	67	CCID50	15	28	8	Jefferey et al 2002
ae_vigilax	aedes	B94/20	4.9	79	CCID50	14	28	8	Jefferey et al 2002
ae_vigilax	aedes	B94/20	5.6	100	CCID50	13	28	8	Jefferey et al 2002
ae_vigilax	aedes	B94/20	6.3	93	CCID50	14	28	8	Jefferey et al 2002
ae_vigilax	aedes	B94/20	7	100	CCID50	12	28	8	Jefferey et al 2002
ae_vigilax	aedes	B94/20	6.3	100	CCID50	10	28	2	Jefferey et al 2002
ae_vigilax	aedes	B94/20	6.3	100	CCID50	10	28	4	Jefferey et al 2002
ae_vigilax	aedes	B94/20	6.3	90	CCID50	10	28	6	Jefferey et al 2002
ae_vigilax	aedes	B94/20	6.3	100	CCID50	10	28	8	Jefferey et al 2002
ae_vigilax	aedes	B94/20	6.3	100	CCID50	10	28	10	Jefferey et al 2002
ae_vigilax	aedes	B94/20	6.3	100	CCID50	8	28	12	Jefferey et al 2002
ae_vigilax	aedes	T48	4.5	0	SMIC	30	28	10	Kay 1982
ae_vigilax	aedes	T48	5.5	0	SMIC	24	28	10	Kay 1982
ae_vigilax	aedes	T48	6.5	17	SMIC	30	28	10	Kay 1982
ae_vigilax	aedes	T48	6.7	69	SMIC	16	28	10	Kay 1982
ae_vigilax	aedes	T48	7	83	SMIC	6	28	10	Kay 1982
ae_vigilax	aedes	T48	7.5	77	SMIC	65	28	10	Kay 1982
ae_vigilax	aedes	T48	8.6	85	SMIC	26	28	10	Kay 1982
ae_vigilax	aedes	T48	9	100	SMIC	19	28	10	Kay 1982
ae_vigilax	aedes	ATCC, CCL-81	8.1	79	TCID50	19	28	8	Ramirez et al. 2018
ae_vigilax	aedes	ATCC, CCL-81	8.1	89	TCID50	19	28	11	Ramirez et al. 2018
ae_vigilax	aedes	ATCC, CCL-81	8.1	76	TCID50	17	28	15	Ramirez et al. 2018
ae_vigilax	aedes	B94/20	5.7	19	CCID50	51	28	10	Ryan, Do, Kay 2000
ae_vigilax	aedes	B94/20	6.7	70	CCID50	33	28	10	Ryan, Do, Kay 2000
ae_vigilax	aedes	B94/20	7.7	86	CCID50	118	28	10	Ryan, Do, Kay 2000
ae_vigilax	aedes	B94/20	7.7	64	CCID50	22	28	4	Ryan, Do, Kay 2000
ae_vigilax	aedes	B94/20	7.7	92	CCID50	12	28	7	Ryan, Do, Kay 2000
ae_vigilax	aedes	B94/20	7.7	90	CCID50	10	28	8	Ryan, Do, Kay 2000
ae_vigilax	aedes	T48	2.9	0	TCID50	14	22-26	5	Vale et al 1992
ae_vigilax	aedes	T48	4.6	4	TCID50	24	22-26	5	Vale et al 1992
ae_vigilax	aedes	T48	5.7	29	TCID50	24	22-26	5	Vale et al 1992
ae_vigilax	aedes	T48	6.5	86	TCID50	22	22-26	5	Vale et al 1992
ae_vigilax	aedes	T48	7.9	91	TCID50	11	22-26	5	Vale et al 1992
ae_vigilax	aedes	B94/20	6.3	97	TCID50/mL	34	27	12	Jefferey, J.A.L.; Kay, B.H.; Ryan, P.A. Role of Verrallina funerea (Diptera: Culicidae) in transmission of Barmah Forest virus and Ross River virus in coastal areas of eastern Australia. Journal of Medical Entomology 2006, 43, 1239-1247.
ae_vigilax	aedes	B94/20	6.3	77	TCID50/mL	13	27	12	Jefferey, J.A.L.; Kay, B.H.; Ryan, P.A. Role of Verrallina funerea (Diptera: Culicidae) in transmission of Barmah Forest virus and Ross River virus in coastal areas of eastern Australia. Journal of Medical Entomology 2006, 43, 1239-1247.
ae_vigilax	aedes	B94/20	6.3	91	TCID50/mL	23	27	12	Jefferey, J.A.L.; Kay, B.H.; Ryan, P.A. Role of Verrallina funerea (Diptera: Culicidae) in transmission of Barmah Forest virus and Ross River virus in coastal areas of eastern Australia. Journal of Medical Entomology 2006, 43, 1239-1247.
ae_vigilax	aedes	B94/20	6.3	97	TCID50/mL	30	27	12	Jefferey, J.A.L.; Kay, B.H.; Ryan, P.A. Role of Verrallina funerea (Diptera: Culicidae) in transmission of Barmah Forest virus and Ross River virus in coastal areas of eastern Australia. Journal of Medical Entomology 2006, 43, 1239-1247.
ae_vigilax	aedes	B94/20	5.1	45	TCID50/mL	20	28	10	Jennings, C.D.; Kay, B.H. Dissemination barriers to Ross River virus in Aedes vigilax and the effects of larval nutrition on their expression. Med Vet Entomol 1999, 13, 431-438.
ae_vigilax	aedes	B94/20	6.4	80	TCID50/mL	20	28	10	Jennings, C.D.; Kay, B.H. Dissemination barriers to Ross River virus in Aedes vigilax and the effects of larval nutrition on their expression. Med Vet Entomol 1999, 13, 431-438.
ae_vigilax	aedes	B94/20	7.4	94	TCID50/mL	83	28	10	Jennings, C.D.; Kay, B.H. Dissemination barriers to Ross River virus in Aedes vigilax and the effects of larval nutrition on their expression. Med Vet Entomol 1999, 13, 431-438.
ae_vigilax	aedes	B94/20	3.2	10	TCID50/mL	10	28	10	Jennings, C.D.; Kay, B.H. Dissemination barriers to Ross River virus in Aedes vigilax and the effects of larval nutrition on their expression. Med Vet Entomol 1999, 13, 431-438.
ae_vigilax	aedes	B94/20	3.2	0	TCID50/mL	10	28	10	Jennings, C.D.; Kay, B.H. Dissemination barriers to Ross River virus in Aedes vigilax and the effects of larval nutrition on their expression. Med Vet Entomol 1999, 13, 431-438.
ae_vigilax	aedes	B94/20	3.2	10	TCID50/mL	10	28	10	Jennings, C.D.; Kay, B.H. Dissemination barriers to Ross River virus in Aedes vigilax and the effects of larval nutrition on their expression. Med Vet Entomol 1999, 13, 431-438.
ae_vigilax	aedes	B94/20	4.4	40	TCID50/mL	10	28	10	Jennings, C.D.; Kay, B.H. Dissemination barriers to Ross River virus in Aedes vigilax and the effects of larval nutrition on their expression. Med Vet Entomol 1999, 13, 431-438.
ae_vigilax	aedes	B94/20	4.4	50	TCID50/mL	10	28	10	Jennings, C.D.; Kay, B.H. Dissemination barriers to Ross River virus in Aedes vigilax and the effects of larval nutrition on their expression. Med Vet Entomol 1999, 13, 431-438.
ae_vigilax	aedes	B94/20	4.4	20	TCID50/mL	10	28	10	Jennings, C.D.; Kay, B.H. Dissemination barriers to Ross River virus in Aedes vigilax and the effects of larval nutrition on their expression. Med Vet Entomol 1999, 13, 431-438.
ae_vigilax	aedes	B94/20	6.3	80	TCID50/mL	10	28	10	Jennings, C.D.; Kay, B.H. Dissemination barriers to Ross River virus in Aedes vigilax and the effects of larval nutrition on their expression. Med Vet Entomol 1999, 13, 431-438.
ae_vigilax	aedes	B94/20	6.3	80	TCID50/mL	10	28	10	Jennings, C.D.; Kay, B.H. Dissemination barriers to Ross River virus in Aedes vigilax and the effects of larval nutrition on their expression. Med Vet Entomol 1999, 13, 431-438.
ae_vigilax	aedes	B94/20	6.3	60	TCID50/mL	10	28	10	Jennings, C.D.; Kay, B.H. Dissemination barriers to Ross River virus in Aedes vigilax and the effects of larval nutrition on their expression. Med Vet Entomol 1999, 13, 431-438.
ae_vigilax	aedes	B94/20	7.2	90	TCID50/mL	10	28	10	Jennings, C.D.; Kay, B.H. Dissemination barriers to Ross River virus in Aedes vigilax and the effects of larval nutrition on their expression. Med Vet Entomol 1999, 13, 431-438.
ae_vigilax	aedes	B94/20	7.2	90	TCID50/mL	10	28	10	Jennings, C.D.; Kay, B.H. Dissemination barriers to Ross River virus in Aedes vigilax and the effects of larval nutrition on their expression. Med Vet Entomol 1999, 13, 431-438.
ae_vigilax	aedes	B94/20	7.2	100	TCID50/mL	10	28	10	Jennings, C.D.; Kay, B.H. Dissemination barriers to Ross River virus in Aedes vigilax and the effects of larval nutrition on their expression. Med Vet Entomol 1999, 13, 431-438.
ae_vigilax	aedes	B94/20	3.2	0	TCID50/mL	10	28	10	Jennings, C.D.; Kay, B.H. Dissemination barriers to Ross River virus in Aedes vigilax and the effects of larval nutrition on their expression. Med Vet Entomol 1999, 13, 431-438.
ae_vigilax	aedes	B94/20	3.2	0	TCID50/mL	10	28	10	Jennings, C.D.; Kay, B.H. Dissemination barriers to Ross River virus in Aedes vigilax and the effects of larval nutrition on their expression. Med Vet Entomol 1999, 13, 431-438.
ae_vigilax	aedes	B94/20	3.2	0	TCID50/mL	10	28	10	Jennings, C.D.; Kay, B.H. Dissemination barriers to Ross River virus in Aedes vigilax and the effects of larval nutrition on their expression. Med Vet Entomol 1999, 13, 431-438.
ae_vigilax	aedes	B94/20	4.4	30	TCID50/mL	10	28	10	Jennings, C.D.; Kay, B.H. Dissemination barriers to Ross River virus in Aedes vigilax and the effects of larval nutrition on their expression. Med Vet Entomol 1999, 13, 431-438.
ae_vigilax	aedes	B94/20	4.4	20	TCID50/mL	10	28	10	Jennings, C.D.; Kay, B.H. Dissemination barriers to Ross River virus in Aedes vigilax and the effects of larval nutrition on their expression. Med Vet Entomol 1999, 13, 431-438.
ae_vigilax	aedes	B94/20	4.4	60	TCID50/mL	10	28	10	Jennings, C.D.; Kay, B.H. Dissemination barriers to Ross River virus in Aedes vigilax and the effects of larval nutrition on their expression. Med Vet Entomol 1999, 13, 431-438.
ae_vigilax	aedes	B94/20	6.3	80	TCID50/mL	10	28	10	Jennings, C.D.; Kay, B.H. Dissemination barriers to Ross River virus in Aedes vigilax and the effects of larval nutrition on their expression. Med Vet Entomol 1999, 13, 431-438.
ae_vigilax	aedes	B94/20	6.3	70	TCID50/mL	10	28	10	Jennings, C.D.; Kay, B.H. Dissemination barriers to Ross River virus in Aedes vigilax and the effects of larval nutrition on their expression. Med Vet Entomol 1999, 13, 431-438.
ae_vigilax	aedes	B94/20	6.3	60	TCID50/mL	10	28	10	Jennings, C.D.; Kay, B.H. Dissemination barriers to Ross River virus in Aedes vigilax and the effects of larval nutrition on their expression. Med Vet Entomol 1999, 13, 431-438.
ae_vigilax	aedes	B94/20	7.2	60	TCID50/mL	10	28	10	Jennings, C.D.; Kay, B.H. Dissemination barriers to Ross River virus in Aedes vigilax and the effects of larval nutrition on their expression. Med Vet Entomol 1999, 13, 431-438.
ae_vigilax	aedes	B94/20	7.2	100	TCID50/mL	10	28	10	Jennings, C.D.; Kay, B.H. Dissemination barriers to Ross River virus in Aedes vigilax and the effects of larval nutrition on their expression. Med Vet Entomol 1999, 13, 431-438.
ae_vigilax	aedes	B94/20	7.2	80	TCID50/mL	10	28	10	Jennings, C.D.; Kay, B.H. Dissemination barriers to Ross River virus in Aedes vigilax and the effects of larval nutrition on their expression. Med Vet Entomol 1999, 13, 431-438.
ae_vigilax	aedes	B94/20	3.2	0	TCID50/mL	10	28	10	Jennings, C.D.; Kay, B.H. Dissemination barriers to Ross River virus in Aedes vigilax and the effects of larval nutrition on their expression. Med Vet Entomol 1999, 13, 431-438.
ae_vigilax	aedes	B94/20	3.2	0	TCID50/mL	10	28	10	Jennings, C.D.; Kay, B.H. Dissemination barriers to Ross River virus in Aedes vigilax and the effects of larval nutrition on their expression. Med Vet Entomol 1999, 13, 431-438.
ae_vigilax	aedes	B94/20	3.2	0	TCID50/mL	10	28	10	Jennings, C.D.; Kay, B.H. Dissemination barriers to Ross River virus in Aedes vigilax and the effects of larval nutrition on their expression. Med Vet Entomol 1999, 13, 431-438.
ae_vigilax	aedes	B94/20	4.4	50	TCID50/mL	10	28	10	Jennings, C.D.; Kay, B.H. Dissemination barriers to Ross River virus in Aedes vigilax and the effects of larval nutrition on their expression. Med Vet Entomol 1999, 13, 431-438.
ae_vigilax	aedes	B94/20	4.4	40	TCID50/mL	10	28	10	Jennings, C.D.; Kay, B.H. Dissemination barriers to Ross River virus in Aedes vigilax and the effects of larval nutrition on their expression. Med Vet Entomol 1999, 13, 431-438.
ae_vigilax	aedes	B94/20	4.4	60	TCID50/mL	10	28	10	Jennings, C.D.; Kay, B.H. Dissemination barriers to Ross River virus in Aedes vigilax and the effects of larval nutrition on their expression. Med Vet Entomol 1999, 13, 431-438.
ae_vigilax	aedes	B94/20	6.3	80	TCID50/mL	10	28	10	Jennings, C.D.; Kay, B.H. Dissemination barriers to Ross River virus in Aedes vigilax and the effects of larval nutrition on their expression. Med Vet Entomol 1999, 13, 431-438.
ae_vigilax	aedes	B94/20	6.3	80	TCID50/mL	10	28	10	Jennings, C.D.; Kay, B.H. Dissemination barriers to Ross River virus in Aedes vigilax and the effects of larval nutrition on their expression. Med Vet Entomol 1999, 13, 431-438.
ae_vigilax	aedes	B94/20	6.3	70	TCID50/mL	10	28	10	Jennings, C.D.; Kay, B.H. Dissemination barriers to Ross River virus in Aedes vigilax and the effects of larval nutrition on their expression. Med Vet Entomol 1999, 13, 431-438.
ae_vigilax	aedes	B94/20	7.2	100	TCID50/mL	10	28	10	Jennings, C.D.; Kay, B.H. Dissemination barriers to Ross River virus in Aedes vigilax and the effects of larval nutrition on their expression. Med Vet Entomol 1999, 13, 431-438.
ae_vigilax	aedes	B94/20	7.2	100	TCID50/mL	10	28	10	Jennings, C.D.; Kay, B.H. Dissemination barriers to Ross River virus in Aedes vigilax and the effects of larval nutrition on their expression. Med Vet Entomol 1999, 13, 431-438.
ae_vigilax	aedes	B94/20	7.2	80	TCID50/mL	10	28	10	Jennings, C.D.; Kay, B.H. Dissemination barriers to Ross River virus in Aedes vigilax and the effects of larval nutrition on their expression. Med Vet Entomol 1999, 13, 431-438.
ae_vigilax	aedes	B94/20	3.2	10	TCID50/mL	10	28	10	Jennings, C.D.; Kay, B.H. Dissemination barriers to Ross River virus in Aedes vigilax and the effects of larval nutrition on their expression. Med Vet Entomol 1999, 13, 431-438.
ae_vigilax	aedes	B94/20	3.2	0	TCID50/mL	10	28	10	Jennings, C.D.; Kay, B.H. Dissemination barriers to Ross River virus in Aedes vigilax and the effects of larval nutrition on their expression. Med Vet Entomol 1999, 13, 431-438.
ae_vigilax	aedes	B94/20	3.2	10	TCID50/mL	10	28	10	Jennings, C.D.; Kay, B.H. Dissemination barriers to Ross River virus in Aedes vigilax and the effects of larval nutrition on their expression. Med Vet Entomol 1999, 13, 431-438.
ae_vigilax	aedes	B94/20	4.4	40	TCID50/mL	10	28	10	Jennings, C.D.; Kay, B.H. Dissemination barriers to Ross River virus in Aedes vigilax and the effects of larval nutrition on their expression. Med Vet Entomol 1999, 13, 431-438.
ae_vigilax	aedes	B94/20	4.4	60	TCID50/mL	10	28	10	Jennings, C.D.; Kay, B.H. Dissemination barriers to Ross River virus in Aedes vigilax and the effects of larval nutrition on their expression. Med Vet Entomol 1999, 13, 431-438.
ae_vigilax	aedes	B94/20	4.4	40	TCID50/mL	10	28	10	Jennings, C.D.; Kay, B.H. Dissemination barriers to Ross River virus in Aedes vigilax and the effects of larval nutrition on their expression. Med Vet Entomol 1999, 13, 431-438.
ae_vigilax	aedes	B94/20	6.3	80	TCID50/mL	10	28	10	Jennings, C.D.; Kay, B.H. Dissemination barriers to Ross River virus in Aedes vigilax and the effects of larval nutrition on their expression. Med Vet Entomol 1999, 13, 431-438.
ae_vigilax	aedes	B94/20	6.3	90	TCID50/mL	10	28	10	Jennings, C.D.; Kay, B.H. Dissemination barriers to Ross River virus in Aedes vigilax and the effects of larval nutrition on their expression. Med Vet Entomol 1999, 13, 431-438.
ae_vigilax	aedes	B94/20	6.3	100	TCID50/mL	10	28	10	Jennings, C.D.; Kay, B.H. Dissemination barriers to Ross River virus in Aedes vigilax and the effects of larval nutrition on their expression. Med Vet Entomol 1999, 13, 431-438.
ae_vigilax	aedes	B94/20	7.2	100	TCID50/mL	10	28	10	Jennings, C.D.; Kay, B.H. Dissemination barriers to Ross River virus in Aedes vigilax and the effects of larval nutrition on their expression. Med Vet Entomol 1999, 13, 431-438.
ae_vigilax	aedes	B94/20	7.2	80	TCID50/mL	10	28	10	Jennings, C.D.; Kay, B.H. Dissemination barriers to Ross River virus in Aedes vigilax and the effects of larval nutrition on their expression. Med Vet Entomol 1999, 13, 431-438.
ae_vigilax	aedes	B94/20	7.2	90	TCID50/mL	10	28	10	Jennings, C.D.; Kay, B.H. Dissemination barriers to Ross River virus in Aedes vigilax and the effects of larval nutrition on their expression. Med Vet Entomol 1999, 13, 431-438.
ae_vigilax	aedes	B94/20	3.2	0	TCID50/mL	10	28	10	Jennings, C.D.; Kay, B.H. Dissemination barriers to Ross River virus in Aedes vigilax and the effects of larval nutrition on their expression. Med Vet Entomol 1999, 13, 431-438.
ae_vigilax	aedes	B94/20	3.2	0	TCID50/mL	10	28	10	Jennings, C.D.; Kay, B.H. Dissemination barriers to Ross River virus in Aedes vigilax and the effects of larval nutrition on their expression. Med Vet Entomol 1999, 13, 431-438.
ae_vigilax	aedes	B94/20	3.2	10	TCID50/mL	10	28	10	Jennings, C.D.; Kay, B.H. Dissemination barriers to Ross River virus in Aedes vigilax and the effects of larval nutrition on their expression. Med Vet Entomol 1999, 13, 431-438.
ae_vigilax	aedes	B94/20	4.4	40	TCID50/mL	10	28	10	Jennings, C.D.; Kay, B.H. Dissemination barriers to Ross River virus in Aedes vigilax and the effects of larval nutrition on their expression. Med Vet Entomol 1999, 13, 431-438.
ae_vigilax	aedes	B94/20	4.4	40	TCID50/mL	10	28	10	Jennings, C.D.; Kay, B.H. Dissemination barriers to Ross River virus in Aedes vigilax and the effects of larval nutrition on their expression. Med Vet Entomol 1999, 13, 431-438.
ae_vigilax	aedes	B94/20	4.4	30	TCID50/mL	10	28	10	Jennings, C.D.; Kay, B.H. Dissemination barriers to Ross River virus in Aedes vigilax and the effects of larval nutrition on their expression. Med Vet Entomol 1999, 13, 431-438.
ae_vigilax	aedes	B94/20	6.3	60	TCID50/mL	10	28	10	Jennings, C.D.; Kay, B.H. Dissemination barriers to Ross River virus in Aedes vigilax and the effects of larval nutrition on their expression. Med Vet Entomol 1999, 13, 431-438.
ae_vigilax	aedes	B94/20	6.3	60	TCID50/mL	10	28	10	Jennings, C.D.; Kay, B.H. Dissemination barriers to Ross River virus in Aedes vigilax and the effects of larval nutrition on their expression. Med Vet Entomol 1999, 13, 431-438.
ae_vigilax	aedes	B94/20	6.3	60	TCID50/mL	10	28	10	Jennings, C.D.; Kay, B.H. Dissemination barriers to Ross River virus in Aedes vigilax and the effects of larval nutrition on their expression. Med Vet Entomol 1999, 13, 431-438.
ae_vigilax	aedes	B94/20	7.2	90	TCID50/mL	10	28	10	Jennings, C.D.; Kay, B.H. Dissemination barriers to Ross River virus in Aedes vigilax and the effects of larval nutrition on their expression. Med Vet Entomol 1999, 13, 431-438.
ae_vigilax	aedes	B94/20	7.2	90	TCID50/mL	10	28	10	Jennings, C.D.; Kay, B.H. Dissemination barriers to Ross River virus in Aedes vigilax and the effects of larval nutrition on their expression. Med Vet Entomol 1999, 13, 431-438.
ae_vigilax	aedes	B94/20	7.2	100	TCID50/mL	10	28	10	Jennings, C.D.; Kay, B.H. Dissemination barriers to Ross River virus in Aedes vigilax and the effects of larval nutrition on their expression. Med Vet Entomol 1999, 13, 431-438.
ae_vigilax	aedes	B94/20	3.2	0	TCID50/mL	10	28	10	Jennings, C.D.; Kay, B.H. Dissemination barriers to Ross River virus in Aedes vigilax and the effects of larval nutrition on their expression. Med Vet Entomol 1999, 13, 431-438.
ae_vigilax	aedes	B94/20	3.2	10	TCID50/mL	10	28	10	Jennings, C.D.; Kay, B.H. Dissemination barriers to Ross River virus in Aedes vigilax and the effects of larval nutrition on their expression. Med Vet Entomol 1999, 13, 431-438.
ae_vigilax	aedes	B94/20	3.2	0	TCID50/mL	10	28	10	Jennings, C.D.; Kay, B.H. Dissemination barriers to Ross River virus in Aedes vigilax and the effects of larval nutrition on their expression. Med Vet Entomol 1999, 13, 431-438.
ae_vigilax	aedes	B94/20	4.4	50	TCID50/mL	10	28	10	Jennings, C.D.; Kay, B.H. Dissemination barriers to Ross River virus in Aedes vigilax and the effects of larval nutrition on their expression. Med Vet Entomol 1999, 13, 431-438.
ae_vigilax	aedes	B94/20	4.4	40	TCID50/mL	10	28	10	Jennings, C.D.; Kay, B.H. Dissemination barriers to Ross River virus in Aedes vigilax and the effects of larval nutrition on their expression. Med Vet Entomol 1999, 13, 431-438.
ae_vigilax	aedes	B94/20	4.4	40	TCID50/mL	10	28	10	Jennings, C.D.; Kay, B.H. Dissemination barriers to Ross River virus in Aedes vigilax and the effects of larval nutrition on their expression. Med Vet Entomol 1999, 13, 431-438.
ae_vigilax	aedes	B94/20	6.3	70	TCID50/mL	10	28	10	Jennings, C.D.; Kay, B.H. Dissemination barriers to Ross River virus in Aedes vigilax and the effects of larval nutrition on their expression. Med Vet Entomol 1999, 13, 431-438.
ae_vigilax	aedes	B94/20	6.3	80	TCID50/mL	10	28	10	Jennings, C.D.; Kay, B.H. Dissemination barriers to Ross River virus in Aedes vigilax and the effects of larval nutrition on their expression. Med Vet Entomol 1999, 13, 431-438.
ae_vigilax	aedes	B94/20	6.3	80	TCID50/mL	10	28	10	Jennings, C.D.; Kay, B.H. Dissemination barriers to Ross River virus in Aedes vigilax and the effects of larval nutrition on their expression. Med Vet Entomol 1999, 13, 431-438.
ae_vigilax	aedes	B94/20	7.2	100	TCID50/mL	10	28	10	Jennings, C.D.; Kay, B.H. Dissemination barriers to Ross River virus in Aedes vigilax and the effects of larval nutrition on their expression. Med Vet Entomol 1999, 13, 431-438.
ae_vigilax	aedes	B94/20	7.2	100	TCID50/mL	10	28	10	Jennings, C.D.; Kay, B.H. Dissemination barriers to Ross River virus in Aedes vigilax and the effects of larval nutrition on their expression. Med Vet Entomol 1999, 13, 431-438.
ae_vigilax	aedes	B94/20	7.2	100	TCID50/mL	10	28	10	Jennings, C.D.; Kay, B.H. Dissemination barriers to Ross River virus in Aedes vigilax and the effects of larval nutrition on their expression. Med Vet Entomol 1999, 13, 431-438.
ae_vigilax	aedes	B94/20	6.6	90	TCID50/mL	10	18	1	Kay, B.H.; Jennings, C.D. Enhancement or modulation of the vector competence of Ochlerotatus vigilax (Diptera: Culicidae) for ross river virus by temperature. Journal of Medical Entomology 2002, 39, 99-105.
ae_vigilax	aedes	B94/20	6.6	90	TCID50/mL	10	18	2	Kay, B.H.; Jennings, C.D. Enhancement or modulation of the vector competence of Ochlerotatus vigilax (Diptera: Culicidae) for ross river virus by temperature. Journal of Medical Entomology 2002, 39, 99-105.
ae_vigilax	aedes	B94/20	6.6	100	TCID50/mL	10	18	3	Kay, B.H.; Jennings, C.D. Enhancement or modulation of the vector competence of Ochlerotatus vigilax (Diptera: Culicidae) for ross river virus by temperature. Journal of Medical Entomology 2002, 39, 99-105.
ae_vigilax	aedes	B94/20	6.6	90	TCID50/mL	10	18	5	Kay, B.H.; Jennings, C.D. Enhancement or modulation of the vector competence of Ochlerotatus vigilax (Diptera: Culicidae) for ross river virus by temperature. Journal of Medical Entomology 2002, 39, 99-105.
ae_vigilax	aedes	B94/20	6.6	100	TCID50/mL	10	18	7	Kay, B.H.; Jennings, C.D. Enhancement or modulation of the vector competence of Ochlerotatus vigilax (Diptera: Culicidae) for ross river virus by temperature. Journal of Medical Entomology 2002, 39, 99-105.
ae_vigilax	aedes	B94/20	6.6	80	TCID50/mL	10	18	9	Kay, B.H.; Jennings, C.D. Enhancement or modulation of the vector competence of Ochlerotatus vigilax (Diptera: Culicidae) for ross river virus by temperature. Journal of Medical Entomology 2002, 39, 99-105.
ae_vigilax	aedes	B94/20	6.6	100	TCID50/mL	10	18	12	Kay, B.H.; Jennings, C.D. Enhancement or modulation of the vector competence of Ochlerotatus vigilax (Diptera: Culicidae) for ross river virus by temperature. Journal of Medical Entomology 2002, 39, 99-105.
ae_vigilax	aedes	B94/20	6.6	100	TCID50/mL	10	18	14	Kay, B.H.; Jennings, C.D. Enhancement or modulation of the vector competence of Ochlerotatus vigilax (Diptera: Culicidae) for ross river virus by temperature. Journal of Medical Entomology 2002, 39, 99-105.
ae_vigilax	aedes	B94/20	6.6	100	TCID50/mL	10	18	16	Kay, B.H.; Jennings, C.D. Enhancement or modulation of the vector competence of Ochlerotatus vigilax (Diptera: Culicidae) for ross river virus by temperature. Journal of Medical Entomology 2002, 39, 99-105.
ae_vigilax	aedes	B94/20	6.6	90	TCID50/mL	10	18	18	Kay, B.H.; Jennings, C.D. Enhancement or modulation of the vector competence of Ochlerotatus vigilax (Diptera: Culicidae) for ross river virus by temperature. Journal of Medical Entomology 2002, 39, 99-105.
ae_vigilax	aedes	B94/20	6.6	80	TCID50/mL	10	18	20	Kay, B.H.; Jennings, C.D. Enhancement or modulation of the vector competence of Ochlerotatus vigilax (Diptera: Culicidae) for ross river virus by temperature. Journal of Medical Entomology 2002, 39, 99-105.
ae_vigilax	aedes	B94/20	6.6	90	TCID50/mL	10	18	25	Kay, B.H.; Jennings, C.D. Enhancement or modulation of the vector competence of Ochlerotatus vigilax (Diptera: Culicidae) for ross river virus by temperature. Journal of Medical Entomology 2002, 39, 99-105.
ae_vigilax	aedes	B94/20	6.6	100	TCID50/mL	6	18	30	Kay, B.H.; Jennings, C.D. Enhancement or modulation of the vector competence of Ochlerotatus vigilax (Diptera: Culicidae) for ross river virus by temperature. Journal of Medical Entomology 2002, 39, 99-105.
ae_vigilax	aedes	B94/20	6.6	90	TCID50/mL	10	18	35	Kay, B.H.; Jennings, C.D. Enhancement or modulation of the vector competence of Ochlerotatus vigilax (Diptera: Culicidae) for ross river virus by temperature. Journal of Medical Entomology 2002, 39, 99-105.
ae_vigilax	aedes	B94/20	6.6	100	TCID50/mL	10	25	1	Kay, B.H.; Jennings, C.D. Enhancement or modulation of the vector competence of Ochlerotatus vigilax (Diptera: Culicidae) for ross river virus by temperature. Journal of Medical Entomology 2002, 39, 99-105.
ae_vigilax	aedes	B94/20	6.6	100	TCID50/mL	10	25	2	Kay, B.H.; Jennings, C.D. Enhancement or modulation of the vector competence of Ochlerotatus vigilax (Diptera: Culicidae) for ross river virus by temperature. Journal of Medical Entomology 2002, 39, 99-105.
ae_vigilax	aedes	B94/20	6.6	100	TCID50/mL	10	25	3	Kay, B.H.; Jennings, C.D. Enhancement or modulation of the vector competence of Ochlerotatus vigilax (Diptera: Culicidae) for ross river virus by temperature. Journal of Medical Entomology 2002, 39, 99-105.
ae_vigilax	aedes	B94/20	6.6	100	TCID50/mL	10	25	4	Kay, B.H.; Jennings, C.D. Enhancement or modulation of the vector competence of Ochlerotatus vigilax (Diptera: Culicidae) for ross river virus by temperature. Journal of Medical Entomology 2002, 39, 99-105.
ae_vigilax	aedes	B94/20	6.6	100	TCID50/mL	10	25	5	Kay, B.H.; Jennings, C.D. Enhancement or modulation of the vector competence of Ochlerotatus vigilax (Diptera: Culicidae) for ross river virus by temperature. Journal of Medical Entomology 2002, 39, 99-105.
ae_vigilax	aedes	B94/20	6.6	100	TCID50/mL	10	25	6	Kay, B.H.; Jennings, C.D. Enhancement or modulation of the vector competence of Ochlerotatus vigilax (Diptera: Culicidae) for ross river virus by temperature. Journal of Medical Entomology 2002, 39, 99-105.
ae_vigilax	aedes	B94/20	6.6	100	TCID50/mL	10	25	7	Kay, B.H.; Jennings, C.D. Enhancement or modulation of the vector competence of Ochlerotatus vigilax (Diptera: Culicidae) for ross river virus by temperature. Journal of Medical Entomology 2002, 39, 99-105.
ae_vigilax	aedes	B94/20	6.6	100	TCID50/mL	10	25	8	Kay, B.H.; Jennings, C.D. Enhancement or modulation of the vector competence of Ochlerotatus vigilax (Diptera: Culicidae) for ross river virus by temperature. Journal of Medical Entomology 2002, 39, 99-105.
ae_vigilax	aedes	B94/20	6.6	83	TCID50/mL	12	25	9	Kay, B.H.; Jennings, C.D. Enhancement or modulation of the vector competence of Ochlerotatus vigilax (Diptera: Culicidae) for ross river virus by temperature. Journal of Medical Entomology 2002, 39, 99-105.
ae_vigilax	aedes	B94/20	6.6	100	TCID50/mL	10	25	10	Kay, B.H.; Jennings, C.D. Enhancement or modulation of the vector competence of Ochlerotatus vigilax (Diptera: Culicidae) for ross river virus by temperature. Journal of Medical Entomology 2002, 39, 99-105.
ae_vigilax	aedes	B94/20	6.6	100	TCID50/mL	10	25	12	Kay, B.H.; Jennings, C.D. Enhancement or modulation of the vector competence of Ochlerotatus vigilax (Diptera: Culicidae) for ross river virus by temperature. Journal of Medical Entomology 2002, 39, 99-105.
ae_vigilax	aedes	B94/20	6.6	100	TCID50/mL	10	25	14	Kay, B.H.; Jennings, C.D. Enhancement or modulation of the vector competence of Ochlerotatus vigilax (Diptera: Culicidae) for ross river virus by temperature. Journal of Medical Entomology 2002, 39, 99-105.
ae_vigilax	aedes	B94/20	6.6	100	TCID50/mL	12	25	16	Kay, B.H.; Jennings, C.D. Enhancement or modulation of the vector competence of Ochlerotatus vigilax (Diptera: Culicidae) for ross river virus by temperature. Journal of Medical Entomology 2002, 39, 99-105.
ae_vigilax	aedes	B94/20	6.6	100	TCID50/mL	12	25	18	Kay, B.H.; Jennings, C.D. Enhancement or modulation of the vector competence of Ochlerotatus vigilax (Diptera: Culicidae) for ross river virus by temperature. Journal of Medical Entomology 2002, 39, 99-105.
ae_vigilax	aedes	B94/20	6.6	100	TCID50/mL	8	25	20	Kay, B.H.; Jennings, C.D. Enhancement or modulation of the vector competence of Ochlerotatus vigilax (Diptera: Culicidae) for ross river virus by temperature. Journal of Medical Entomology 2002, 39, 99-105.
ae_vigilax	aedes	B94/20	6.6	100	TCID50/mL	12	25	25	Kay, B.H.; Jennings, C.D. Enhancement or modulation of the vector competence of Ochlerotatus vigilax (Diptera: Culicidae) for ross river virus by temperature. Journal of Medical Entomology 2002, 39, 99-105.
ae_vigilax	aedes	B94/20	6.6	100	TCID50/mL	10	18	1	Kay, B.H.; Jennings, C.D. Enhancement or modulation of the vector competence of Ochlerotatus vigilax (Diptera: Culicidae) for ross river virus by temperature. Journal of Medical Entomology 2002, 39, 99-105.
ae_vigilax	aedes	B94/20	6.6	100	TCID50/mL	10	18	2	Kay, B.H.; Jennings, C.D. Enhancement or modulation of the vector competence of Ochlerotatus vigilax (Diptera: Culicidae) for ross river virus by temperature. Journal of Medical Entomology 2002, 39, 99-105.
ae_vigilax	aedes	B94/20	6.6	100	TCID50/mL	10	18	3	Kay, B.H.; Jennings, C.D. Enhancement or modulation of the vector competence of Ochlerotatus vigilax (Diptera: Culicidae) for ross river virus by temperature. Journal of Medical Entomology 2002, 39, 99-105.
ae_vigilax	aedes	B94/20	6.6	100	TCID50/mL	10	18	5	Kay, B.H.; Jennings, C.D. Enhancement or modulation of the vector competence of Ochlerotatus vigilax (Diptera: Culicidae) for ross river virus by temperature. Journal of Medical Entomology 2002, 39, 99-105.
ae_vigilax	aedes	B94/20	6.6	100	TCID50/mL	10	18	7	Kay, B.H.; Jennings, C.D. Enhancement or modulation of the vector competence of Ochlerotatus vigilax (Diptera: Culicidae) for ross river virus by temperature. Journal of Medical Entomology 2002, 39, 99-105.
ae_vigilax	aedes	B94/20	6.6	100	TCID50/mL	10	18	9	Kay, B.H.; Jennings, C.D. Enhancement or modulation of the vector competence of Ochlerotatus vigilax (Diptera: Culicidae) for ross river virus by temperature. Journal of Medical Entomology 2002, 39, 99-105.
ae_vigilax	aedes	B94/20	6.6	87	TCID50/mL	8	18	12	Kay, B.H.; Jennings, C.D. Enhancement or modulation of the vector competence of Ochlerotatus vigilax (Diptera: Culicidae) for ross river virus by temperature. Journal of Medical Entomology 2002, 39, 99-105.
ae_vigilax	aedes	B94/20	6.6	100	TCID50/mL	8	18	14	Kay, B.H.; Jennings, C.D. Enhancement or modulation of the vector competence of Ochlerotatus vigilax (Diptera: Culicidae) for ross river virus by temperature. Journal of Medical Entomology 2002, 39, 99-105.
ae_vigilax	aedes	B94/20	6.6	83	TCID50/mL	6	18	16	Kay, B.H.; Jennings, C.D. Enhancement or modulation of the vector competence of Ochlerotatus vigilax (Diptera: Culicidae) for ross river virus by temperature. Journal of Medical Entomology 2002, 39, 99-105.
ae_vigilax	aedes	B94/20	6.6	80	TCID50/mL	15	18	20	Kay, B.H.; Jennings, C.D. Enhancement or modulation of the vector competence of Ochlerotatus vigilax (Diptera: Culicidae) for ross river virus by temperature. Journal of Medical Entomology 2002, 39, 99-105.
ae_vigilax	aedes	B94/20	5.6	70	TCID50/mL	40	18	7	Kay, B.H.; Jennings, C.D. Enhancement or modulation of the vector competence of Ochlerotatus vigilax (Diptera: Culicidae) for ross river virus by temperature. Journal of Medical Entomology 2002, 39, 99-105.
ae_vigilax	aedes	B94/20	5.6	82	TCID50/mL	39	18	14	Kay, B.H.; Jennings, C.D. Enhancement or modulation of the vector competence of Ochlerotatus vigilax (Diptera: Culicidae) for ross river virus by temperature. Journal of Medical Entomology 2002, 39, 99-105.
ae_vigilax	aedes	B94/20	5.6	63	TCID50/mL	40	25	7	Kay, B.H.; Jennings, C.D. Enhancement or modulation of the vector competence of Ochlerotatus vigilax (Diptera: Culicidae) for ross river virus by temperature. Journal of Medical Entomology 2002, 39, 99-105.
ae_vigilax	aedes	B94/20	5.6	70	TCID50/mL	30	25	14	Kay, B.H.; Jennings, C.D. Enhancement or modulation of the vector competence of Ochlerotatus vigilax (Diptera: Culicidae) for ross river virus by temperature. Journal of Medical Entomology 2002, 39, 99-105.
ae_vigilax	aedes	B94/20	5.6	78	TCID50/mL	40	18	7	Kay, B.H.; Jennings, C.D. Enhancement or modulation of the vector competence of Ochlerotatus vigilax (Diptera: Culicidae) for ross river virus by temperature. Journal of Medical Entomology 2002, 39, 99-105.
ae_vigilax	aedes	B94/20	5.6	63	TCID50/mL	24	18	14	Kay, B.H.; Jennings, C.D. Enhancement or modulation of the vector competence of Ochlerotatus vigilax (Diptera: Culicidae) for ross river virus by temperature. Journal of Medical Entomology 2002, 39, 99-105.
ae_vigilax	aedes	B94/20	5.6	68	TCID50/mL	40	25	7	Kay, B.H.; Jennings, C.D. Enhancement or modulation of the vector competence of Ochlerotatus vigilax (Diptera: Culicidae) for ross river virus by temperature. Journal of Medical Entomology 2002, 39, 99-105.
ae_vigilax	aedes	B94/20	5.6	65	TCID50/mL	40	25	14	Kay, B.H.; Jennings, C.D. Enhancement or modulation of the vector competence of Ochlerotatus vigilax (Diptera: Culicidae) for ross river virus by temperature. Journal of Medical Entomology 2002, 39, 99-105.
ae_vigilax	aedes	B94/20	5.6	73	TCID50/mL	30	32	7	Kay, B.H.; Jennings, C.D. Enhancement or modulation of the vector competence of Ochlerotatus vigilax (Diptera: Culicidae) for ross river virus by temperature. Journal of Medical Entomology 2002, 39, 99-105.
ae_vigilax	aedes	B94/20	5.6	72	TCID50/mL	18	32	14	Kay, B.H.; Jennings, C.D. Enhancement or modulation of the vector competence of Ochlerotatus vigilax (Diptera: Culicidae) for ross river virus by temperature. Journal of Medical Entomology 2002, 39, 99-105.
ae_vigilax	aedes	B94/20	5.6	53	TCID50/mL	40	25	7	Kay, B.H.; Jennings, C.D. Enhancement or modulation of the vector competence of Ochlerotatus vigilax (Diptera: Culicidae) for ross river virus by temperature. Journal of Medical Entomology 2002, 39, 99-105.
ae_vigilax	aedes	B94/20	5.6	69	TCID50/mL	36	25	14	Kay, B.H.; Jennings, C.D. Enhancement or modulation of the vector competence of Ochlerotatus vigilax (Diptera: Culicidae) for ross river virus by temperature. Journal of Medical Entomology 2002, 39, 99-105.
ae_vigilax	aedes	B94/20	5.6	70	TCID50/mL	30	32	7	Kay, B.H.; Jennings, C.D. Enhancement or modulation of the vector competence of Ochlerotatus vigilax (Diptera: Culicidae) for ross river virus by temperature. Journal of Medical Entomology 2002, 39, 99-105.
ae_vigilax	aedes	B94/20	5.6	48	TCID50/mL	21	32	14	Kay, B.H.; Jennings, C.D. Enhancement or modulation of the vector competence of Ochlerotatus vigilax (Diptera: Culicidae) for ross river virus by temperature. Journal of Medical Entomology 2002, 39, 99-105.
ae_vigilax	aedes	B94/20	5.6	72	TCID50/mL	18	18-25	14	Kay, B.H.; Jennings, C.D. Enhancement or modulation of the vector competence of Ochlerotatus vigilax (Diptera: Culicidae) for ross river virus by temperature. Journal of Medical Entomology 2002, 39, 99-105.
ae_vigilax	aedes	B94/20	5.6	62	TCID50/mL	21	25-18	14	Kay, B.H.; Jennings, C.D. Enhancement or modulation of the vector competence of Ochlerotatus vigilax (Diptera: Culicidae) for ross river virus by temperature. Journal of Medical Entomology 2002, 39, 99-105.
ae_vigilax	aedes	B94/20	5.6	60	TCID50/mL	20	25-18	14	Kay, B.H.; Jennings, C.D. Enhancement or modulation of the vector competence of Ochlerotatus vigilax (Diptera: Culicidae) for ross river virus by temperature. Journal of Medical Entomology 2002, 39, 99-105.
ae_vigilax	aedes	B94/20	5.6	63	TCID50/mL	16	25-32	14	Kay, B.H.; Jennings, C.D. Enhancement or modulation of the vector competence of Ochlerotatus vigilax (Diptera: Culicidae) for ross river virus by temperature. Journal of Medical Entomology 2002, 39, 99-105.
ae_vigilax	aedes	B94/20	5.6	67	TCID50/mL	9	32-25	14	Kay, B.H.; Jennings, C.D. Enhancement or modulation of the vector competence of Ochlerotatus vigilax (Diptera: Culicidae) for ross river virus by temperature. Journal of Medical Entomology 2002, 39, 99-105.
cq_linealis	coquillettidia	B94/20	4.2	32	CCID50	31	28	8	Jefferey et al 2002
cq_linealis	coquillettidia	B94/20	4.9	60	CCID50	30	28	8	Jefferey et al 2002
cq_linealis	coquillettidia	B94/20	5.6	80	CCID50	30	28	8	Jefferey et al 2002
cq_linealis	coquillettidia	B94/20	6.3	93	CCID50	30	28	8	Jefferey et al 2002
cq_linealis	coquillettidia	B94/20	7	100	CCID50	30	28	8	Jefferey et al 2002
cq_linealis	coquillettidia	B94/20	6.3	96	CCID50	25	28	2	Jefferey et al 2002
cq_linealis	coquillettidia	B94/20	6.3	96	CCID50	25	28	4	Jefferey et al 2002
cq_linealis	coquillettidia	B94/20	6.3	96	CCID50	25	28	6	Jefferey et al 2002
cq_linealis	coquillettidia	B94/20	6.3	100	CCID50	25	28	8	Jefferey et al 2002
cq_linealis	coquillettidia	B94/20	6.3	96	CCID50	25	28	10	Jefferey et al 2002
cq_linealis	coquillettidia	B94/20	6.3	76	CCID50	25	28	12	Jefferey et al 2002
cx_annulirostris	culex	B94/20	8.5	83	TCID50	64	25	7	Doggett, S.L.; Klowden, M.J.; Russell, R.C. Are vector competence experiments competent vector experiments. Arbovirus Research in Australia 2001, 8, 126-130.
cx_annulirostris	culex	B94/20	4.7	0	CCID50	74	28	10	Ryan, P.A.; Do, K.-A.; Kay, B.H. Definition of Ross River virus vectors at Maroochy Shire, Australia. Journal of Medical Entomology 2000, 37, 146-152.
cx_annulirostris	culex	B94/20	5.7	0	CCID50	78	28	10	Ryan, P.A.; Do, K.-A.; Kay, B.H. Definition of Ross River virus vectors at Maroochy Shire, Australia. Journal of Medical Entomology 2000, 37, 146-152.
cx_annulirostris	culex	B94/20	6.7	5	CCID50	52	28	10	Ryan, P.A.; Do, K.-A.; Kay, B.H. Definition of Ross River virus vectors at Maroochy Shire, Australia. Journal of Medical Entomology 2000, 37, 146-152.
cx_annulirostris	culex	B94/20	7.7	40	CCID50	195	28	10	Ryan, P.A.; Do, K.-A.; Kay, B.H. Definition of Ross River virus vectors at Maroochy Shire, Australia. Journal of Medical Entomology 2000, 37, 146-152.
cx_annulirostris	culex	B94/20	7.7	38	CCID50	16	28	8	Ryan, P.A.; Do, K.-A.; Kay, B.H. Definition of Ross River virus vectors at Maroochy Shire, Australia. Journal of Medical Entomology 2000, 37, 146-152.
cx_annulirostris	culex	B94/20	7.7	31	CCID50	16	28	12	Ryan, P.A.; Do, K.-A.; Kay, B.H. Definition of Ross River virus vectors at Maroochy Shire, Australia. Journal of Medical Entomology 2000, 37, 146-152.
cx_annulirostris	culex	B94/20	7.7	62	CCID50	13	28	20	Ryan, P.A.; Do, K.-A.; Kay, B.H. Definition of Ross River virus vectors at Maroochy Shire, Australia. Journal of Medical Entomology 2000, 37, 146-152.
cx_austraclicus	culex	B94/20	5.7	5	CCID50	37	28	10	Ryan, Do, Kay 2000
cx_austraclicus	culex	B94/20	6.7	40	CCID50	19	28	10	Ryan, Do, Kay 2000
cx_austraclicus	culex	B94/20	7.7	73	CCID50	72	28	10	Ryan, Do, Kay 2000
cx_austraclicus	culex	B94/20	7.7	73	CCID50	11	28	7	Ryan, Do, Kay 2000
cx_austraclicus	culex	B94/20	7.7	67	CCID50	18	28	12	Ryan, Do, Kay 2000
cx_quinquefasciatus	culex	T48	6.2	0	LD50	44	28	10	Kay, B.; Fanning, I.; Carley, J. Vector competence of Culex pipiens quinquefasciatus for Murray Valley encephalitis, Kunjin, and Ross River viruses from Australia. American Journal of Tropical Medicine and Hygiene 1982, 31, 844-848.
cx_quinquefasciatus	culex	T48	7.2	0	LD50	32	28	10	Kay, B.; Fanning, I.; Carley, J. Vector competence of Culex pipiens quinquefasciatus for Murray Valley encephalitis, Kunjin, and Ross River viruses from Australia. American Journal of Tropical Medicine and Hygiene 1982, 31, 844-848.
cx_quinquefasciatus	culex	T48	8.1	0	LD50	5	28	10	Kay, B.; Fanning, I.; Carley, J. Vector competence of Culex pipiens quinquefasciatus for Murray Valley encephalitis, Kunjin, and Ross River viruses from Australia. American Journal of Tropical Medicine and Hygiene 1982, 31, 844-848.
cx_quinquefasciatus	culex	T48	5.2	0	LD50	36	28	10	Kay, B.; Fanning, I.; Carley, J. Vector competence of Culex pipiens quinquefasciatus for Murray Valley encephalitis, Kunjin, and Ross River viruses from Australia. American Journal of Tropical Medicine and Hygiene 1982, 31, 844-848.
cx_quinquefasciatus	culex	T48	6.2	0	LD50	30	28	10	Kay, B.; Fanning, I.; Carley, J. Vector competence of Culex pipiens quinquefasciatus for Murray Valley encephalitis, Kunjin, and Ross River viruses from Australia. American Journal of Tropical Medicine and Hygiene 1982, 31, 844-848.
cx_quinquefasciatus	culex	T48	7.2	0	LD50	31	28	10	Kay, B.; Fanning, I.; Carley, J. Vector competence of Culex pipiens quinquefasciatus for Murray Valley encephalitis, Kunjin, and Ross River viruses from Australia. American Journal of Tropical Medicine and Hygiene 1982, 31, 844-848.
cx_quinquefasciatus	culex	T48	8.1	36	LD50	11	28	10	Kay, B.; Fanning, I.; Carley, J. Vector competence of Culex pipiens quinquefasciatus for Murray Valley encephalitis, Kunjin, and Ross River viruses from Australia. American Journal of Tropical Medicine and Hygiene 1982, 31, 844-848.
cx_quinquefasciatus	culex	T48	5.2	0	LD50	9	28	10	Kay, B.; Fanning, I.; Carley, J. Vector competence of Culex pipiens quinquefasciatus for Murray Valley encephalitis, Kunjin, and Ross River viruses from Australia. American Journal of Tropical Medicine and Hygiene 1982, 31, 844-848.
cx_quinquefasciatus	culex	T48	6.2	0	LD50	31	28	10	Kay, B.; Fanning, I.; Carley, J. Vector competence of Culex pipiens quinquefasciatus for Murray Valley encephalitis, Kunjin, and Ross River viruses from Australia. American Journal of Tropical Medicine and Hygiene 1982, 31, 844-848.
cx_quinquefasciatus	culex	T48	7.2	0	LD50	33	28	10	Kay, B.; Fanning, I.; Carley, J. Vector competence of Culex pipiens quinquefasciatus for Murray Valley encephalitis, Kunjin, and Ross River viruses from Australia. American Journal of Tropical Medicine and Hygiene 1982, 31, 844-848.
cx_quinquefasciatus	culex	T48	8.1	100	LD50	1	28	10	Kay, B.; Fanning, I.; Carley, J. Vector competence of Culex pipiens quinquefasciatus for Murray Valley encephalitis, Kunjin, and Ross River viruses from Australia. American Journal of Tropical Medicine and Hygiene 1982, 31, 844-848.
cx_quinquefasciatus	culex	T48	7.2	0	LD50	25	28	10	Kay, B.; Fanning, I.; Carley, J. Vector competence of Culex pipiens quinquefasciatus for Murray Valley encephalitis, Kunjin, and Ross River viruses from Australia. American Journal of Tropical Medicine and Hygiene 1982, 31, 844-848.
cx_quinquefasciatus	culex	T48	6.2	12	LD50	17	28	10	Kay, B.; Fanning, I.; Carley, J. Vector competence of Culex pipiens quinquefasciatus for Murray Valley encephalitis, Kunjin, and Ross River viruses from Australia. American Journal of Tropical Medicine and Hygiene 1982, 31, 844-848.
cx_quinquefasciatus	culex	T48	7.2	0	LD50	44	28	10	Kay, B.; Fanning, I.; Carley, J. Vector competence of Culex pipiens quinquefasciatus for Murray Valley encephalitis, Kunjin, and Ross River viruses from Australia. American Journal of Tropical Medicine and Hygiene 1982, 31, 844-848.
cx_quinquefasciatus	culex	T48	8.1	20	LD50	5	28	10	Kay, B.; Fanning, I.; Carley, J. Vector competence of Culex pipiens quinquefasciatus for Murray Valley encephalitis, Kunjin, and Ross River viruses from Australia. American Journal of Tropical Medicine and Hygiene 1982, 31, 844-848.
cx_quinquefasciatus	culex	T48	6.2	0	LD50	51	28	10	Kay, B.; Fanning, I.; Carley, J. Vector competence of Culex pipiens quinquefasciatus for Murray Valley encephalitis, Kunjin, and Ross River viruses from Australia. American Journal of Tropical Medicine and Hygiene 1982, 31, 844-848.
cx_quinquefasciatus	culex	T48	7.2	3	LD50	61	28	10	Kay, B.; Fanning, I.; Carley, J. Vector competence of Culex pipiens quinquefasciatus for Murray Valley encephalitis, Kunjin, and Ross River viruses from Australia. American Journal of Tropical Medicine and Hygiene 1982, 31, 844-848.
cx_quinquefasciatus	culex	T48	8.1	17	LD50	18	28	10	Kay, B.; Fanning, I.; Carley, J. Vector competence of Culex pipiens quinquefasciatus for Murray Valley encephalitis, Kunjin, and Ross River viruses from Australia. American Journal of Tropical Medicine and Hygiene 1982, 31, 844-848.
cx_sitiens	culex	T48	5.9	0	TCID50	27	28	10	Fanning, I.D.; Mottram, P.; Kay, B.H. Studies on the vector competence and autogeny in Culex sitiens Wiedemann (Diptera: Culicidae). Journal of the Australian Entomological Society 1992, 31, 249-253.
cx_sitiens	culex	T48	6.9	32	TCID50	27	28	10	Fanning, I.D.; Mottram, P.; Kay, B.H. Studies on the vector competence and autogeny in Culex sitiens Wiedemann (Diptera: Culicidae). Journal of the Australian Entomological Society 1992, 31, 249-253.
cx_sitiens	culex	T48	7.9	30	TCID50	27	28	10	Fanning, I.D.; Mottram, P.; Kay, B.H. Studies on the vector competence and autogeny in Culex sitiens Wiedemann (Diptera: Culicidae). Journal of the Australian Entomological Society 1992, 31, 249-253.
cx_sitiens	culex	T48	8.6	23	TCID50	27	28	10	Fanning, I.D.; Mottram, P.; Kay, B.H. Studies on the vector competence and autogeny in Culex sitiens Wiedemann (Diptera: Culicidae). Journal of the Australian Entomological Society 1992, 31, 249-253.
cx_sitiens	culex	T48	8.9	50	TCID50	27	28	10	Fanning, I.D.; Mottram, P.; Kay, B.H. Studies on the vector competence and autogeny in Culex sitiens Wiedemann (Diptera: Culicidae). Journal of the Australian Entomological Society 1992, 31, 249-253.
cx_sitiens	culex	T48	9	26	TCID50	27	28	10	Fanning, I.D.; Mottram, P.; Kay, B.H. Studies on the vector competence and autogeny in Culex sitiens Wiedemann (Diptera: Culicidae). Journal of the Australian Entomological Society 1992, 31, 249-253.
cx_sitiens	culex	T48	9.1	50	TCID50	27	28	10	Fanning, I.D.; Mottram, P.; Kay, B.H. Studies on the vector competence and autogeny in Culex sitiens Wiedemann (Diptera: Culicidae). Journal of the Australian Entomological Society 1992, 31, 249-253.
cx_sitiens	culex	T48	9.3	50	TCID50	27	28	10	Fanning, I.D.; Mottram, P.; Kay, B.H. Studies on the vector competence and autogeny in Culex sitiens Wiedemann (Diptera: Culicidae). Journal of the Australian Entomological Society 1992, 31, 249-253.
cx_sitiens	culex	T48	9.3	35	TCID50	21	28	4	Fanning, I.D.; Mottram, P.; Kay, B.H. Studies on the vector competence and autogeny in Culex sitiens Wiedemann (Diptera: Culicidae). Journal of the Australian Entomological Society 1992, 31, 249-253.
cx_sitiens	culex	T48	9.3	30	TCID50	20	28	7.5	Fanning, I.D.; Mottram, P.; Kay, B.H. Studies on the vector competence and autogeny in Culex sitiens Wiedemann (Diptera: Culicidae). Journal of the Australian Entomological Society 1992, 31, 249-253.
cx_sitiens	culex	T48	9.3	50	TCID50	20	28	10.5	Fanning, I.D.; Mottram, P.; Kay, B.H. Studies on the vector competence and autogeny in Culex sitiens Wiedemann (Diptera: Culicidae). Journal of the Australian Entomological Society 1992, 31, 249-253.
cx_sitiens	culex	T48	9.3	40	TCID50	12	28	14	Fanning, I.D.; Mottram, P.; Kay, B.H. Studies on the vector competence and autogeny in Culex sitiens Wiedemann (Diptera: Culicidae). Journal of the Australian Entomological Society 1992, 31, 249-253.
cx_sitiens	culex	T48	9.3	65	TCID50	11	28	18	Fanning, I.D.; Mottram, P.; Kay, B.H. Studies on the vector competence and autogeny in Culex sitiens Wiedemann (Diptera: Culicidae). Journal of the Australian Entomological Society 1992, 31, 249-253.
cx_sitiens	culex	B94/20	5.7	0	CCID50	24	28	10	Ryan, P.A.; Do, K.-A.; Kay, B.H. Definition of Ross River virus vectors at Maroochy Shire, Australia. Journal of Medical Entomology 2000, 37, 146-152.
cx_sitiens	culex	B94/20	6.7	0	CCID50	13	28	10	Ryan, P.A.; Do, K.-A.; Kay, B.H. Definition of Ross River virus vectors at Maroochy Shire, Australia. Journal of Medical Entomology 2000, 37, 146-152.
cx_sitiens	culex	B94/20	7.7	8	CCID50	37	28	10	Ryan, P.A.; Do, K.-A.; Kay, B.H. Definition of Ross River virus vectors at Maroochy Shire, Australia. Journal of Medical Entomology 2000, 37, 146-152.
ma_septempunctata	mansonia	RR102MP	5.7	35	CCID50	141	28	5	Webb et al 2008
ma_uniformis	mansonia	B94/20	7.7	80	CCID50	5	28	10	Ryan, Do, Kay 2000
ve_carmenti	verrallina	RR2186	4.3	34	CCID50	41	28	7	Webb, C.E.; Doggett, S.L.; Ritchie, S.A.; Russell, R.C. Vector competence of three Australian mosquitoes, Verrallina carmenti, Verraullina lineata, and Mansonia septempunctata (Diptera: Culicidae), for Ross River virus. J Med Entomol 2008, 45, 737-740.
ve_carmenti	verrallina	RR2186	5.3	80	CCID50	25	28	7	Webb, C.E.; Doggett, S.L.; Ritchie, S.A.; Russell, R.C. Vector competence of three Australian mosquitoes, Verrallina carmenti, Verraullina lineata, and Mansonia septempunctata (Diptera: Culicidae), for Ross River virus. J Med Entomol 2008, 45, 737-740.
ve_carmenti	verrallina	RR2186	6.3	94	CCID50	34	28	7	Webb, C.E.; Doggett, S.L.; Ritchie, S.A.; Russell, R.C. Vector competence of three Australian mosquitoes, Verrallina carmenti, Verraullina lineata, and Mansonia septempunctata (Diptera: Culicidae), for Ross River virus. J Med Entomol 2008, 45, 737-740.
ve_carmenti	verrallina	RR2186	7.3	89	CCID50	27	28	7	Webb, C.E.; Doggett, S.L.; Ritchie, S.A.; Russell, R.C. Vector competence of three Australian mosquitoes, Verrallina carmenti, Verraullina lineata, and Mansonia septempunctata (Diptera: Culicidae), for Ross River virus. J Med Entomol 2008, 45, 737-740.
ve_carmenti	verrallina	RR102MP	7.6	93	CCID50	40	28	7	Webb, C.E.; Doggett, S.L.; Ritchie, S.A.; Russell, R.C. Vector competence of three Australian mosquitoes, Verrallina carmenti, Verraullina lineata, and Mansonia septempunctata (Diptera: Culicidae), for Ross River virus. J Med Entomol 2008, 45, 737-740.
ve_carmenti	verrallina	RR2186	8.3	91	CCID50	33	28	7	Webb, C.E.; Doggett, S.L.; Ritchie, S.A.; Russell, R.C. Vector competence of three Australian mosquitoes, Verrallina carmenti, Verraullina lineata, and Mansonia septempunctata (Diptera: Culicidae), for Ross River virus. J Med Entomol 2008, 45, 737-740.
ve_funerea	verrallina	B94/20	4.7	0	CCID50	24	28	10	Ryan, P.A.; Do, K.-A.; Kay, B.H. Definition of Ross River virus vectors at Maroochy Shire, Australia. Journal of Medical Entomology 2000, 37, 146-152.
ve_funerea	verrallina	B94/20	5.7	0	CCID50	13	28	10	Ryan, P.A.; Do, K.-A.; Kay, B.H. Definition of Ross River virus vectors at Maroochy Shire, Australia. Journal of Medical Entomology 2000, 37, 146-152.
ve_funerea	verrallina	B94/20	6.7	26	CCID50	34	28	10	Ryan, P.A.; Do, K.-A.; Kay, B.H. Definition of Ross River virus vectors at Maroochy Shire, Australia. Journal of Medical Entomology 2000, 37, 146-152.
ve_funerea	verrallina	B94/20	7.7	86	CCID50	162	28	10	Ryan, P.A.; Do, K.-A.; Kay, B.H. Definition of Ross River virus vectors at Maroochy Shire, Australia. Journal of Medical Entomology 2000, 37, 146-152.
ve_funerea	verrallina	B94/20	7.7	83	CCID50	24	28	7	Ryan, P.A.; Do, K.-A.; Kay, B.H. Definition of Ross River virus vectors at Maroochy Shire, Australia. Journal of Medical Entomology 2000, 37, 146-152.
ve_funerea	verrallina	B94/20	7.7	100	CCID50	12	28	8	Ryan, P.A.; Do, K.-A.; Kay, B.H. Definition of Ross River virus vectors at Maroochy Shire, Australia. Journal of Medical Entomology 2000, 37, 146-152.
ve_funerea	verrallina	B94/20	7.7	100	CCID50	23	28	9	Ryan, P.A.; Do, K.-A.; Kay, B.H. Definition of Ross River virus vectors at Maroochy Shire, Australia. Journal of Medical Entomology 2000, 37, 146-152.
ve_funerea	verrallina	B94/20	6.3	80	TCID50/mL	20	27	2	Jefferey, J.A.L.; Kay, B.H.; Ryan, P.A. Role of Verrallina funerea (Diptera: Culicidae) in transmission of Barmah Forest virus and Ross River virus in coastal areas of eastern Australia. Journal of Medical Entomology 2006, 43, 1239-1247.
ve_funerea	verrallina	B94/20	6.3	70	TCID50/mL	20	27	4	Jefferey, J.A.L.; Kay, B.H.; Ryan, P.A. Role of Verrallina funerea (Diptera: Culicidae) in transmission of Barmah Forest virus and Ross River virus in coastal areas of eastern Australia. Journal of Medical Entomology 2006, 43, 1239-1247.
ve_funerea	verrallina	B94/20	6.3	65	TCID50/mL	20	27	6	Jefferey, J.A.L.; Kay, B.H.; Ryan, P.A. Role of Verrallina funerea (Diptera: Culicidae) in transmission of Barmah Forest virus and Ross River virus in coastal areas of eastern Australia. Journal of Medical Entomology 2006, 43, 1239-1247.
ve_funerea	verrallina	B94/20	6.3	55	TCID50/mL	20	27	8	Jefferey, J.A.L.; Kay, B.H.; Ryan, P.A. Role of Verrallina funerea (Diptera: Culicidae) in transmission of Barmah Forest virus and Ross River virus in coastal areas of eastern Australia. Journal of Medical Entomology 2006, 43, 1239-1247.
ve_funerea	verrallina	B94/20	6.3	60	TCID50/mL	20	27	10	Jefferey, J.A.L.; Kay, B.H.; Ryan, P.A. Role of Verrallina funerea (Diptera: Culicidae) in transmission of Barmah Forest virus and Ross River virus in coastal areas of eastern Australia. Journal of Medical Entomology 2006, 43, 1239-1247.
ve_funerea	verrallina	B94/20	6.3	50	TCID50/mL	20	27	12	Jefferey, J.A.L.; Kay, B.H.; Ryan, P.A. Role of Verrallina funerea (Diptera: Culicidae) in transmission of Barmah Forest virus and Ross River virus in coastal areas of eastern Australia. Journal of Medical Entomology 2006, 43, 1239-1247.
ve_funerea	verrallina	B94/20	6.3	97	TCID50/mL	30	27	12	Jefferey, J.A.L.; Kay, B.H.; Ryan, P.A. Role of Verrallina funerea (Diptera: Culicidae) in transmission of Barmah Forest virus and Ross River virus in coastal areas of eastern Australia. Journal of Medical Entomology 2006, 43, 1239-1247.
ve_funerea	verrallina	B94/20	6.3	83	TCID50/mL	35	27	12	Jefferey, J.A.L.; Kay, B.H.; Ryan, P.A. Role of Verrallina funerea (Diptera: Culicidae) in transmission of Barmah Forest virus and Ross River virus in coastal areas of eastern Australia. Journal of Medical Entomology 2006, 43, 1239-1247.
ve_funerea	verrallina	B94/20	6.3	96	TCID50/mL	25	27	12	Jefferey, J.A.L.; Kay, B.H.; Ryan, P.A. Role of Verrallina funerea (Diptera: Culicidae) in transmission of Barmah Forest virus and Ross River virus in coastal areas of eastern Australia. Journal of Medical Entomology 2006, 43, 1239-1247.
ve_funerea	verrallina	B94/20	6.3	87	TCID50/mL	30	27	12	Jefferey, J.A.L.; Kay, B.H.; Ryan, P.A. Role of Verrallina funerea (Diptera: Culicidae) in transmission of Barmah Forest virus and Ross River virus in coastal areas of eastern Australia. Journal of Medical Entomology 2006, 43, 1239-1247.
ve_lineata	verrallina	RR2186	3.5	7	CCID50	15	28	7	Webb, C.E.; Doggett, S.L.; Ritchie, S.A.; Russell, R.C. Vector competence of three Australian mosquitoes, Verrallina carmenti, Verraullina lineata, and Mansonia septempunctata (Diptera: Culicidae), for Ross River virus. J Med Entomol 2008, 45, 737-740.
ve_lineata	verrallina	RR2186	4.5	15	CCID50	19	28	7	Webb, C.E.; Doggett, S.L.; Ritchie, S.A.; Russell, R.C. Vector competence of three Australian mosquitoes, Verrallina carmenti, Verraullina lineata, and Mansonia septempunctata (Diptera: Culicidae), for Ross River virus. J Med Entomol 2008, 45, 737-740.
ve_lineata	verrallina	RR2186	5.5	41	CCID50	29	28	7	Webb, C.E.; Doggett, S.L.; Ritchie, S.A.; Russell, R.C. Vector competence of three Australian mosquitoes, Verrallina carmenti, Verraullina lineata, and Mansonia septempunctata (Diptera: Culicidae), for Ross River virus. J Med Entomol 2008, 45, 737-740.
ve_lineata	verrallina	RR2186	6.5	32	CCID50	22	28	7	Webb, C.E.; Doggett, S.L.; Ritchie, S.A.; Russell, R.C. Vector competence of three Australian mosquitoes, Verrallina carmenti, Verraullina lineata, and Mansonia septempunctata (Diptera: Culicidae), for Ross River virus. J Med Entomol 2008, 45, 737-740.
ve_lineata	verrallina	RR2186	7.5	86	CCID50	22	28	7	Webb, C.E.; Doggett, S.L.; Ritchie, S.A.; Russell, R.C. Vector competence of three Australian mosquitoes, Verrallina carmenti, Verraullina lineata, and Mansonia septempunctata (Diptera: Culicidae), for Ross River virus. J Med Entomol 2008, 45, 737-740.
ve_lineata	verrallina	RR102MP	7.6	83	CCID50	99	28	7	Webb, C.E.; Doggett, S.L.; Ritchie, S.A.; Russell, R.C. Vector competence of three Australian mosquitoes, Verrallina carmenti, Verraullina lineata, and Mansonia septempunctata (Diptera: Culicidae), for Ross River virus. J Med Entomol 2008, 45, 737-740.
