# Supplementary material for: Physiology and ecology combine to determine host and vector importance for Ross River virus
Source: eLife journal article supplement (doi:10.7554/elife.67018), 2021-08-20
Supplement: supp [file elife-67018-supp-v1.zip › elife_poa_e67018_Source_data_4.csv]

mos_species	strain	dose	unit	day	perc_transm	num_transmitting	total_transmit_tested	method	exp	ref
ae_aegypti	T48	5.9	SMIC	4	69	11	16	suckling mouse	1	Kay, B.; Carley, J.; Fanning, I.; Filippich, C. Quantitative studies of the vector competence of Aedes aegypti, Culex annulirostris and other mosquitoes (Diptera: Culicidae) with Murray Valley encephalitis and other Queensland arboviruses. Journal of Medical Entomology 1979, 16, 59-66.
ae_alternans	5962	5.2	TCID50	10	0	0	7	suckling mouse	2	Wells, P.J.; Russell, R.C.; Cloonan, M.J.; Hueston, L.; Geary, M.J. Virus infection and vector competence of Aedes alternans (Westwood) (Diptera: Culicidae) for Ross River virus. Journal of the Australian Entomological Society 1994, 33, 373-375.
ae_alternans	5962	6.2	TCID50	10	0	0	6	NT	3	Wells, P.J.; Russell, R.C.; Cloonan, M.J.; Hueston, L.; Geary, M.J. Virus infection and vector competence of Aedes alternans (Westwood) (Diptera: Culicidae) for Ross River virus. Journal of the Australian Entomological Society 1994, 33, 373-375.
ae_camptorhynchus	T48	5.2	PFU	3	0	0	4	suckling mouse	4	Ballard, J.W.O.; Marshall, I.D. An investigation of the potential of Aedes camptorhynchus (Thom.) as a vector of Ross River virus. Australian Journal of Experimental Biology and Medical Science 1986, 64, 197-200.
ae_camptorhynchus	T48	5.2	PFU	4	0	0	4	suckling mouse	4	Ballard, J.W.O.; Marshall, I.D. An investigation of the potential of Aedes camptorhynchus (Thom.) as a vector of Ross River virus. Australian Journal of Experimental Biology and Medical Science 1986, 64, 197-200.
ae_camptorhynchus	T48	5.2	PFU	5	25	1	4	suckling mouse	4	Ballard, J.W.O.; Marshall, I.D. An investigation of the potential of Aedes camptorhynchus (Thom.) as a vector of Ross River virus. Australian Journal of Experimental Biology and Medical Science 1986, 64, 197-200.
ae_camptorhynchus	T48	5.2	PFU	6	35	2	7	suckling mouse	4	Ballard, J.W.O.; Marshall, I.D. An investigation of the potential of Aedes camptorhynchus (Thom.) as a vector of Ross River virus. Australian Journal of Experimental Biology and Medical Science 1986, 64, 197-200.
ae_camptorhynchus	T48	5.2	PFU	7	50	2	4	suckling mouse	4	Ballard, J.W.O.; Marshall, I.D. An investigation of the potential of Aedes camptorhynchus (Thom.) as a vector of Ross River virus. Australian Journal of Experimental Biology and Medical Science 1986, 64, 197-200.
ae_camptorhynchus	T48	5.2	PFU	9	100	4	4	suckling mouse	4	Ballard, J.W.O.; Marshall, I.D. An investigation of the potential of Aedes camptorhynchus (Thom.) as a vector of Ross River virus. Australian Journal of Experimental Biology and Medical Science 1986, 64, 197-200.
ae_multiplex	B94/20	5.2		0	0	0	12	suckling mouse	5	Ryan, P.A.; Do, K.-A.; Kay, B.H. Definition of Ross River virus vectors at Maroochy Shire, Australia. Journal of Medical Entomology 2000, 37, 146-152.
ae_multiplex	B94/20	5.2		8	0	0	12	suckling mouse	5	Ryan, P.A.; Do, K.-A.; Kay, B.H. Definition of Ross River virus vectors at Maroochy Shire, Australia. Journal of Medical Entomology 2000, 37, 146-152.
ae_notoscriptus	RR5962	6.7	TCID50	3	17	1	6	suckling mouse	6	Doggett, S.L.; Russell, R.C. Aedes notoscriptus can transmit inland and coastal isolates of Ross River and Barmah Forest viruses from New South Wales! Arbovirus Research in Australia 1997, 7, 79-81.
ae_notoscriptus	RR5962	6.7	TCID50	5	0	0	4	capillary tube	6	Doggett, S.L.; Russell, R.C. Aedes notoscriptus can transmit inland and coastal isolates of Ross River and Barmah Forest viruses from New South Wales! Arbovirus Research in Australia 1997, 7, 79-81.
ae_notoscriptus	RR5962	6.7	TCID50	7	33	1	3	capillary tube	6	Doggett, S.L.; Russell, R.C. Aedes notoscriptus can transmit inland and coastal isolates of Ross River and Barmah Forest viruses from New South Wales! Arbovirus Research in Australia 1997, 7, 79-81.
ae_notoscriptus	RR5962	6.7	TCID50	9	75	3	4	capillary tube	6	Doggett, S.L.; Russell, R.C. Aedes notoscriptus can transmit inland and coastal isolates of Ross River and Barmah Forest viruses from New South Wales! Arbovirus Research in Australia 1997, 7, 79-81.
ae_notoscriptus	RR5962	6.7	TCID50	11	38	3	8	capillary tube	6	Doggett, S.L.; Russell, R.C. Aedes notoscriptus can transmit inland and coastal isolates of Ross River and Barmah Forest viruses from New South Wales! Arbovirus Research in Australia 1997, 7, 79-81.
ae_notoscriptus	RR5962	6.7	TCID50	13	33	1	3	capillary tube	6	Doggett, S.L.; Russell, R.C. Aedes notoscriptus can transmit inland and coastal isolates of Ross River and Barmah Forest viruses from New South Wales! Arbovirus Research in Australia 1997, 7, 79-81.
ae_notoscriptus	RR5962	6.7	TCID50	15	0	0	1	capillary tube	6	Doggett, S.L.; Russell, R.C. Aedes notoscriptus can transmit inland and coastal isolates of Ross River and Barmah Forest viruses from New South Wales! Arbovirus Research in Australia 1997, 7, 79-81.
ae_notoscriptus	RR2186	6.6	TCID50	3	57	4	7	capillary tube	7	Doggett, S.L.; Russell, R.C. Aedes notoscriptus can transmit inland and coastal isolates of Ross River and Barmah Forest viruses from New South Wales! Arbovirus Research in Australia 1997, 7, 79-81.
ae_notoscriptus	RR2186	6.6	TCID50	5	60	3	5	capillary tube	7	Doggett, S.L.; Russell, R.C. Aedes notoscriptus can transmit inland and coastal isolates of Ross River and Barmah Forest viruses from New South Wales! Arbovirus Research in Australia 1997, 7, 79-81.
ae_notoscriptus	RR2186	6.6	TCID50	7	83	5	6	capillary tube	7	Doggett, S.L.; Russell, R.C. Aedes notoscriptus can transmit inland and coastal isolates of Ross River and Barmah Forest viruses from New South Wales! Arbovirus Research in Australia 1997, 7, 79-81.
ae_notoscriptus	RR2186	6.6	TCID50	9	71	5	7	capillary tube	7	Doggett, S.L.; Russell, R.C. Aedes notoscriptus can transmit inland and coastal isolates of Ross River and Barmah Forest viruses from New South Wales! Arbovirus Research in Australia 1997, 7, 79-81.
ae_notoscriptus	RR2186	6.6	TCID50	11	67	4	6	capillary tube	7	Doggett, S.L.; Russell, R.C. Aedes notoscriptus can transmit inland and coastal isolates of Ross River and Barmah Forest viruses from New South Wales! Arbovirus Research in Australia 1997, 7, 79-81.
ae_notoscriptus	RR2186	6.6	TCID50	13	57	4	7	capillary tube	7	Doggett, S.L.; Russell, R.C. Aedes notoscriptus can transmit inland and coastal isolates of Ross River and Barmah Forest viruses from New South Wales! Arbovirus Research in Australia 1997, 7, 79-81.
ae_notoscriptus	RR2186	6.6	TCID50	15	100	3	3	capillary tube	7	Doggett, S.L.; Russell, R.C. Aedes notoscriptus can transmit inland and coastal isolates of Ross River and Barmah Forest viruses from New South Wales! Arbovirus Research in Australia 1997, 7, 79-81.
ae_notoscriptus	RR1693	6.5	CCID50	12	0	0	14	capillary tube	8	Ryan, P.A.; Do, K.-A.; Kay, B.H. Definition of Ross River virus vectors at Maroochy Shire, Australia. Journal of Medical Entomology 2000, 37, 146-152.
ae_notoscriptus	B94/20	7.7	CCID50	7	0	0	10	suckling mouse	9	Ryan, P.A.; Do, K.-A.; Kay, B.H. Definition of Ross River virus vectors at Maroochy Shire, Australia. Journal of Medical Entomology 2000, 37, 146-152.
ae_notoscriptus	B94/20	7.7	CCID50	10	0	0	13	suckling mouse	9	Ryan, P.A.; Do, K.-A.; Kay, B.H. Definition of Ross River virus vectors at Maroochy Shire, Australia. Journal of Medical Entomology 2000, 37, 146-152.
ae_notoscriptus	B94/20	7.5	CCID50	4	0	0	21	suckling mouse	10	Watson, T.M.; Kay, B.H. Vector competence of Aedes notoscriptus (Diptera: Culicidae) for Ross River virus in Queensland, Australia. Journal of Medical Entomology 1998, 35, 104-106.
ae_notoscriptus	B94/20	7.5	CCID50	5	0	0	22	suckling mouse	10	Watson, T.M.; Kay, B.H. Vector competence of Aedes notoscriptus (Diptera: Culicidae) for Ross River virus in Queensland, Australia. Journal of Medical Entomology 1998, 35, 104-106.
ae_notoscriptus	B94/20	7.5	CCID50	7	0	0	15	suckling mouse	10	Watson, T.M.; Kay, B.H. Vector competence of Aedes notoscriptus (Diptera: Culicidae) for Ross River virus in Queensland, Australia. Journal of Medical Entomology 1998, 35, 104-106.
ae_notoscriptus	B94/20	7.5	CCID50	9	7	1	15	suckling mouse	10	Watson, T.M.; Kay, B.H. Vector competence of Aedes notoscriptus (Diptera: Culicidae) for Ross River virus in Queensland, Australia. Journal of Medical Entomology 1998, 35, 104-106.
ae_notoscriptus	B94/20	7.5	CCID50	12	13	2	15	suckling mouse	10	Watson, T.M.; Kay, B.H. Vector competence of Aedes notoscriptus (Diptera: Culicidae) for Ross River virus in Queensland, Australia. Journal of Medical Entomology 1998, 35, 104-106.
ae_notoscriptus	B94/20	7.5	CCID50	14	13	2	15	suckling mouse	10	Watson, T.M.; Kay, B.H. Vector competence of Aedes notoscriptus (Diptera: Culicidae) for Ross River virus in Queensland, Australia. Journal of Medical Entomology 1998, 35, 104-106.
ae_notoscriptus	B94/20	7.5	CCID50	17	0	0	7	suckling mouse	10	Watson, T.M.; Kay, B.H. Vector competence of Aedes notoscriptus (Diptera: Culicidae) for Ross River virus in Queensland, Australia. Journal of Medical Entomology 1998, 35, 104-106.
ae_procax	B94/20	7.7	CCID50	0	0	0	44	suckling mouse	11	Ryan, P.A.; Do, K.-A.; Kay, B.H. Definition of Ross River virus vectors at Maroochy Shire, Australia. Journal of Medical Entomology 2000, 37, 146-152.
ae_procax	B94/20	7.7	CCID50	9	64	28	44	suckling mouse	11	Ryan, P.A.; Do, K.-A.; Kay, B.H. Definition of Ross River virus vectors at Maroochy Shire, Australia. Journal of Medical Entomology 2000, 37, 146-152.
ae_procax	B94/20	7.7	CCID50	19	93	13	14	suckling mouse	11	Ryan, P.A.; Do, K.-A.; Kay, B.H. Definition of Ross River virus vectors at Maroochy Shire, Australia. Journal of Medical Entomology 2000, 37, 146-152.
ae_vigilax	B94/20	6.3	CCID50	2	0	0	10	Capillary tube	12	Jeffery, J.A.L.; Ryan, P.A.; Lyons, S.A.; Kay, B.H. Vector competence of Coquillettidia linealis (Skuse) (Diptera: Culicidae) for Ross River and Barmah Forest viruses. Australian Journal of Entomology 2002, 41, 339-344.
ae_vigilax	B94/20	6.3	CCID50	4	10	1	10	Capillary tube	12	Jeffery, J.A.L.; Ryan, P.A.; Lyons, S.A.; Kay, B.H. Vector competence of Coquillettidia linealis (Skuse) (Diptera: Culicidae) for Ross River and Barmah Forest viruses. Australian Journal of Entomology 2002, 41, 339-344.
ae_vigilax	B94/20	6.3	CCID50	6	40	4	10	Capillary tube	12	Jeffery, J.A.L.; Ryan, P.A.; Lyons, S.A.; Kay, B.H. Vector competence of Coquillettidia linealis (Skuse) (Diptera: Culicidae) for Ross River and Barmah Forest viruses. Australian Journal of Entomology 2002, 41, 339-344.
ae_vigilax	B94/20	6.3	CCID50	8	60	6	10	Capillary tube	12	Jeffery, J.A.L.; Ryan, P.A.; Lyons, S.A.; Kay, B.H. Vector competence of Coquillettidia linealis (Skuse) (Diptera: Culicidae) for Ross River and Barmah Forest viruses. Australian Journal of Entomology 2002, 41, 339-344.
ae_vigilax	B94/20	6.3	CCID50	10	30	3	10	Capillary tube	12	Jeffery, J.A.L.; Ryan, P.A.; Lyons, S.A.; Kay, B.H. Vector competence of Coquillettidia linealis (Skuse) (Diptera: Culicidae) for Ross River and Barmah Forest viruses. Australian Journal of Entomology 2002, 41, 339-344.
ae_vigilax	B94/20	6.3	CCID50	12	25	2	8	Capillary tube	12	Jeffery, J.A.L.; Ryan, P.A.; Lyons, S.A.; Kay, B.H. Vector competence of Coquillettidia linealis (Skuse) (Diptera: Culicidae) for Ross River and Barmah Forest viruses. Australian Journal of Entomology 2002, 41, 339-344.
ae_vigilax	T48	7.5	LD50	4	8	1	12	suckling mouse	13	Kay, B. Three modes of transmission of Ross River virus by Aedes vigilax (Skuse). Australian Journal of Experimental Biology and Medical Science 1982, 60, 339-344.
ae_vigilax	T48	7.5	LD50	7	29	5	17	suckling mouse	13	Kay, B. Three modes of transmission of Ross River virus by Aedes vigilax (Skuse). Australian Journal of Experimental Biology and Medical Science 1982, 60, 339-344.
ae_vigilax	T48	7.5	LD50	10	57	8	14	suckling mouse	13	Kay, B. Three modes of transmission of Ross River virus by Aedes vigilax (Skuse). Australian Journal of Experimental Biology and Medical Science 1982, 60, 339-344.
ae_vigilax	T48	7.5	LD50	13	50	6	12	suckling mouse	13	Kay, B. Three modes of transmission of Ross River virus by Aedes vigilax (Skuse). Australian Journal of Experimental Biology and Medical Science 1982, 60, 339-344.
ae_vigilax	388A Cairns	8.1	TCID50	8	47	9	19	Capillary tube	14	Ramirez, A.L.; Hall-Mendelin, S.; Doggett, S.L.; Hewitson, G.R.; McMahon, J.L.; Ritchie, S.A.; van den Hurk, A.F. Mosquito excreta: A sample type with many potential applications for the investigation of Ross River virus and West Nile virus ecology. PLoS Negl Trop Dis 2018, 12, e0006771
ae_vigilax	388A Cairns	8.1	TCID50	11	32	6	19	Capillary tube	14	Ramirez, A.L.; Hall-Mendelin, S.; Doggett, S.L.; Hewitson, G.R.; McMahon, J.L.; Ritchie, S.A.; van den Hurk, A.F. Mosquito excreta: A sample type with many potential applications for the investigation of Ross River virus and West Nile virus ecology. PLoS Negl Trop Dis 2018, 12, e0006771
ae_vigilax	388A Cairns	8.1	TCID50	15	29	5	17	Capillary tube	14	Ramirez, A.L.; Hall-Mendelin, S.; Doggett, S.L.; Hewitson, G.R.; McMahon, J.L.; Ritchie, S.A.; van den Hurk, A.F. Mosquito excreta: A sample type with many potential applications for the investigation of Ross River virus and West Nile virus ecology. PLoS Negl Trop Dis 2018, 12, e0006771
ae_vigilax	B94/20	7.7	CCID50	4	0	0	22	suckling mouse	15	Ryan, P.A.; Do, K.-A.; Kay, B.H. Definition of Ross River virus vectors at Maroochy Shire, Australia. Journal of Medical Entomology 2000, 37, 146-152.
ae_vigilax	B94/20	7.7	CCID50	7	45	5	11	suckling mouse	15	Ryan, P.A.; Do, K.-A.; Kay, B.H. Definition of Ross River virus vectors at Maroochy Shire, Australia. Journal of Medical Entomology 2000, 37, 146-152.
ae_vigilax	B94/20	7.7	CCID50	8	40	4	10	suckling mouse	15	Ryan, P.A.; Do, K.-A.; Kay, B.H. Definition of Ross River virus vectors at Maroochy Shire, Australia. Journal of Medical Entomology 2000, 37, 146-152.
ae_vigilax	B94/20	5.1	TCID50	10	30	6	20	suckling mouse	16	Jennings, C.D.; Kay, B.H. Dissemination barriers to Ross River virus in Aedes vigilax and the effects of larval nutrition on their expression. Med Vet Entomol 1999, 13, 431-438.
ae_vigilax	B94/20	6.4	TCID50	10	75	15	20	suckling mouse	17	Jennings, C.D.; Kay, B.H. Dissemination barriers to Ross River virus in Aedes vigilax and the effects of larval nutrition on their expression. Med Vet Entomol 1999, 13, 431-438.
ae_vigilax	B94/20	7.4	TCID50	10	88	71	81	suckling mouse	18	Jennings, C.D.; Kay, B.H. Dissemination barriers to Ross River virus in Aedes vigilax and the effects of larval nutrition on their expression. Med Vet Entomol 1999, 13, 431-438.
ae_vigilax	B94/20	6.6	TCID50	30	86	6	7	suckling mouse	19	Kay, B.H.; Jennings, C.D. Enhancement or modulation of the vector competence of Ochlerotatus vigilax (Diptera: Culicidae) for ross river virus by temperature. Journal of Medical Entomology 2002, 39, 99-105.
ae_vigilax	B94/20	6.6	TCID50	25	100	8	8	suckling mouse	19	Kay, B.H.; Jennings, C.D. Enhancement or modulation of the vector competence of Ochlerotatus vigilax (Diptera: Culicidae) for ross river virus by temperature. Journal of Medical Entomology 2002, 39, 99-105.
ae_vigilax	B94/20	6.6	TCID50	20	75	3	4	suckling mouse	19	Kay, B.H.; Jennings, C.D. Enhancement or modulation of the vector competence of Ochlerotatus vigilax (Diptera: Culicidae) for ross river virus by temperature. Journal of Medical Entomology 2002, 39, 99-105.
cq_linealis	B94/20	6.3	CCID50	2	4	1	25	Capillary tube	20	Jeffery, J.A.L.; Ryan, P.A.; Lyons, S.A.; Kay, B.H. Vector competence of Coquillettidia linealis (Skuse) (Diptera: Culicidae) for Ross River and Barmah Forest viruses. Australian Journal of Entomology 2002, 41, 339-344.
cq_linealis	B94/20	6.3	CCID50	4	64	16	25	Capillary tube	20	Jeffery, J.A.L.; Ryan, P.A.; Lyons, S.A.; Kay, B.H. Vector competence of Coquillettidia linealis (Skuse) (Diptera: Culicidae) for Ross River and Barmah Forest viruses. Australian Journal of Entomology 2002, 41, 339-344.
cq_linealis	B94/20	6.3	CCID50	6	80	20	25	Capillary tube	20	Jeffery, J.A.L.; Ryan, P.A.; Lyons, S.A.; Kay, B.H. Vector competence of Coquillettidia linealis (Skuse) (Diptera: Culicidae) for Ross River and Barmah Forest viruses. Australian Journal of Entomology 2002, 41, 339-344.
cq_linealis	B94/20	6.3	CCID50	8	92	23	25	Capillary tube	20	Jeffery, J.A.L.; Ryan, P.A.; Lyons, S.A.; Kay, B.H. Vector competence of Coquillettidia linealis (Skuse) (Diptera: Culicidae) for Ross River and Barmah Forest viruses. Australian Journal of Entomology 2002, 41, 339-344.
cq_linealis	B94/20	6.3	CCID50	10	92	23	25	Capillary tube	20	Jeffery, J.A.L.; Ryan, P.A.; Lyons, S.A.; Kay, B.H. Vector competence of Coquillettidia linealis (Skuse) (Diptera: Culicidae) for Ross River and Barmah Forest viruses. Australian Journal of Entomology 2002, 41, 339-344.
cq_linealis	B94/20	6.3	CCID50	12	68	17	25	Capillary tube	20	Jeffery, J.A.L.; Ryan, P.A.; Lyons, S.A.; Kay, B.H. Vector competence of Coquillettidia linealis (Skuse) (Diptera: Culicidae) for Ross River and Barmah Forest viruses. Australian Journal of Entomology 2002, 41, 339-344.
cx_annulirostris	B94/20	7.7	CCID50	8	31	5	16	suckling mouse	21	Ryan, P.A.; Do, K.-A.; Kay, B.H. Definition of Ross River virus vectors at Maroochy Shire, Australia. Journal of Medical Entomology 2000, 37, 146-152.
cx_annulirostris	B94/20	7.7	CCID50	12	8	1	13	suckling mouse	21	Ryan, P.A.; Do, K.-A.; Kay, B.H. Definition of Ross River virus vectors at Maroochy Shire, Australia. Journal of Medical Entomology 2000, 37, 146-152.
cx_annulirostris	B94/20	7.7	CCID50	20	46	6	13	suckling mouse	21	Ryan, P.A.; Do, K.-A.; Kay, B.H. Definition of Ross River virus vectors at Maroochy Shire, Australia. Journal of Medical Entomology 2000, 37, 146-152.
cx_austraclicus	B94/20	7.7	CCID50	7	55	6	11	suckling mouse	22	Ryan, P.A.; Do, K.-A.; Kay, B.H. Definition of Ross River virus vectors at Maroochy Shire, Australia. Journal of Medical Entomology 2000, 37, 146-152.
cx_austraclicus	B94/20	7.7	CCID50	12	59	10	17	suckling mouse	22	Ryan, P.A.; Do, K.-A.; Kay, B.H. Definition of Ross River virus vectors at Maroochy Shire, Australia. Journal of Medical Entomology 2000, 37, 146-152.
cx_sitiens	T48	9.3	TCID50	4	10	2	21	chicks	23	Fanning, I.D.; Mottram, P.; Kay, B.H. Studies on the vector competence and autogeny in Culex sitiens Wiedemann (Diptera: Culicidae). Journal of the Australian Entomological Society 1992, 31, 249-253.
cx_sitiens	T48	9.3	TCID50	8	10	2	20	chicks	23	Fanning, I.D.; Mottram, P.; Kay, B.H. Studies on the vector competence and autogeny in Culex sitiens Wiedemann (Diptera: Culicidae). Journal of the Australian Entomological Society 1992, 31, 249-253.
cx_sitiens	T48	9.3	TCID50	11	25	5	20	chicks	23	Fanning, I.D.; Mottram, P.; Kay, B.H. Studies on the vector competence and autogeny in Culex sitiens Wiedemann (Diptera: Culicidae). Journal of the Australian Entomological Society 1992, 31, 249-253.
cx_sitiens	T48	9.3	TCID50	14	30	4	12	chicks	23	Fanning, I.D.; Mottram, P.; Kay, B.H. Studies on the vector competence and autogeny in Culex sitiens Wiedemann (Diptera: Culicidae). Journal of the Australian Entomological Society 1992, 31, 249-253.
cx_sitiens	T48	9.3	TCID50	18	20	2	11	chicks	23	Fanning, I.D.; Mottram, P.; Kay, B.H. Studies on the vector competence and autogeny in Culex sitiens Wiedemann (Diptera: Culicidae). Journal of the Australian Entomological Society 1992, 31, 249-253.
ma_septempunctata	RR102MP	5.7	CCID50	5	13.3	2	15	Capillary tube	24	Webb, C.E.; Doggett, S.L.; Ritchie, S.A.; Russell, R.C. Vector competence of three Australian mosquitoes, Verrallina carmenti, Verraullina lineata, and Mansonia septempunctata (Diptera: Culicidae), for Ross River virus. J Med Entomol 2008, 45, 737-740.
ma_uniformis	B94/20	7.7	CCID50	11	60	3	5	suckling mouse	25	Ryan, P.A.; Do, K.-A.; Kay, B.H. Definition of Ross River virus vectors at Maroochy Shire, Australia. Journal of Medical Entomology 2000, 37, 146-152.
ve_carmenti	RR2186	4.3	CCID50	7	3.1	1	32	Capillary tube	26	Webb, C.E.; Doggett, S.L.; Ritchie, S.A.; Russell, R.C. Vector competence of three Australian mosquitoes, Verrallina carmenti, Verraullina lineata, and Mansonia septempunctata (Diptera: Culicidae), for Ross River virus. J Med Entomol 2008, 45, 737-740.
ve_carmenti	RR2186	5.3	CCID50	7	8.3	2	24	Capillary tube	27	Webb, C.E.; Doggett, S.L.; Ritchie, S.A.; Russell, R.C. Vector competence of three Australian mosquitoes, Verrallina carmenti, Verraullina lineata, and Mansonia septempunctata (Diptera: Culicidae), for Ross River virus. J Med Entomol 2008, 45, 737-740.
ve_carmenti	RR2186	6.3	CCID50	7	3.1	1	32	Capillary tube	28	Webb, C.E.; Doggett, S.L.; Ritchie, S.A.; Russell, R.C. Vector competence of three Australian mosquitoes, Verrallina carmenti, Verraullina lineata, and Mansonia septempunctata (Diptera: Culicidae), for Ross River virus. J Med Entomol 2008, 45, 737-740.
ve_carmenti	RR2186	7.3	CCID50	7	8.3	2	24	Capillary tube	29	Webb, C.E.; Doggett, S.L.; Ritchie, S.A.; Russell, R.C. Vector competence of three Australian mosquitoes, Verrallina carmenti, Verraullina lineata, and Mansonia septempunctata (Diptera: Culicidae), for Ross River virus. J Med Entomol 2008, 45, 737-740.
ve_carmenti	RR102MP	7.6	CCID50	7	27.5	11	40	Capillary tube	30	Webb, C.E.; Doggett, S.L.; Ritchie, S.A.; Russell, R.C. Vector competence of three Australian mosquitoes, Verrallina carmenti, Verraullina lineata, and Mansonia septempunctata (Diptera: Culicidae), for Ross River virus. J Med Entomol 2008, 45, 737-740.
ve_carmenti	RR2186	8.3	CCID50	7	9.1	3	33	Capillary tube	31	Webb, C.E.; Doggett, S.L.; Ritchie, S.A.; Russell, R.C. Vector competence of three Australian mosquitoes, Verrallina carmenti, Verraullina lineata, and Mansonia septempunctata (Diptera: Culicidae), for Ross River virus. J Med Entomol 2008, 45, 737-740.
ve_funerea	B94/20	7.7	CCID50	7	39	9	23	suckling mouse	32	Ryan, P.A.; Do, K.-A.; Kay, B.H. Definition of Ross River virus vectors at Maroochy Shire, Australia. Journal of Medical Entomology 2000, 37, 146-152.
ve_funerea	B94/20	7.7	CCID50	8	58	7	12	suckling mouse	32	Ryan, P.A.; Do, K.-A.; Kay, B.H. Definition of Ross River virus vectors at Maroochy Shire, Australia. Journal of Medical Entomology 2000, 37, 146-152.
ve_funerea	B94/20	7.7	CCID50	9	25	5	20	suckling mouse	32	Ryan, P.A.; Do, K.-A.; Kay, B.H. Definition of Ross River virus vectors at Maroochy Shire, Australia. Journal of Medical Entomology 2000, 37, 146-152.
ve_lineata	RR102MP	7.6	CCID50	7	19	19	99	Capillary tube	33	Webb, C.E.; Doggett, S.L.; Ritchie, S.A.; Russell, R.C. Vector competence of three Australian mosquitoes, Verrallina carmenti, Verraullina lineata, and Mansonia septempunctata (Diptera: Culicidae), for Ross River virus. J Med Entomol 2008, 45, 737-740.
