# Supplementary material for: Physiology and ecology combine to determine host and vector importance for Ross River virus
Source: eLife journal article supplement (doi:10.7554/elife.67018), 2021-08-20
Supplement: supp [file elife-67018-supp-v1.zip › elife_poa_e67018_Source_data_5.csv]

area	species	count	area_km2	source
cairns	human	150041	1689	2018 census data
cairns	dog	30636.57171	1689	(20.42% people have a dog) based ratio of total #dogs in australia:total number people (from https://animalmedicinesaustralia.org.au/wp-content/uploads/2019/10/ANIM001-Pet-Survey-Report19_v1.7_WEB_high-res.pdf)
cairns	cat	22605.77722	1689	(15.1% of people have a cat) based ratio of total #cats in australia:total # people (from https://animalmedicinesaustralia.org.au/wp-content/uploads/2019/10/ANIM001-Pet-Survey-Report19_v1.7_WEB_high-res.pdf)
cairns	horse	84	1689	Table 3: Ward et al 1996. Estimated based on average property size and average number of horses on a property
cairns	bird	37200	1689	only included Jan-March (peak mosquito biting time/human RRV cases). And included all count data from birdlife https://birdata.birdlife.org.au/explore#area_id=8954&area_layer_id=7&map=-27.3416354_153.0740909_10&months=1%2C2%2C3
cairns	possum	15	20	wildnet confirmed counts - 20km2 based on survey size
cairns	macropod	38	20	wildnet confirmed counts - 20km2 based on survey size
cairns	flying_fox	800	1689	https://www.data.qld.gov.au/dataset/flying-fox-monitoring-program/resource/e0446bcf-7816-4df4-b1b0-79fe69b10073?truncate=30&inner_span=True
cairns	cattle	140973	8944	https://www.mla.com.au/globalassets/mla-corporate/prices--markets/documents/trends--analysis/fast-facts--maps/2020/mla-cattle-herd-population-changes-map-2018-19.pdf
cairns	pig	0	1689
cairns	rabbit
cairns	sheep	2123	8944	https://www.mla.com.au/globalassets/mla-corporate/prices--markets/documents/trends--analysis/fast-facts--maps/2020/mla-sheep-numbers-map-2020-at-june-2019.pdf
brisbane	human	1231605	1343	2018 census data
brisbane	dog	251478.9617	1343	(20.42% people have a dog) based ratio of total #dogs in australia:total number people (from https://animalmedicinesaustralia.org.au/wp-content/uploads/2019/10/ANIM001-Pet-Survey-Report19_v1.7_WEB_high-res.pdf)
brisbane	cat	185558.5357	1343	(15.1% of people have a cat) based ratio of total #cats in australia:total # people (from https://animalmedicinesaustralia.org.au/wp-content/uploads/2019/10/ANIM001-Pet-Survey-Report19_v1.7_WEB_high-res.pdf)
brisbane	horse	279	1343	Table 3: Ward et al 1996. Estimated based on average property size and average number of horses on a property
brisbane	bird	97747	1343	only included Jan-March (peak mosquito biting time/human RRV cases). And included all count data from birdlife https://birdata.birdlife.org.au/explore#area_id=8954&area_layer_id=7&map=-27.3416354_153.0740909_10&months=1%2C2%2C3
brisbane	possum	432	20	wildnet confirmed counts - 20km2 based on survey size
brisbane	macropod	139	20	wildnet confirmed counts - 20km2 based on survey size
brisbane	flying_fox	26049	1343	https://www.data.qld.gov.au/dataset/flying-fox-monitoring-program/resource/e0446bcf-7816-4df4-b1b0-79fe69b10073?truncate=30&inner_span=True
brisbane	cattle	304056	22420	https://www.mla.com.au/globalassets/mla-corporate/prices--markets/documents/trends--analysis/fast-facts--maps/2020/mla-cattle-herd-population-changes-map-2018-19.pdf
brisbane	pig	0	1689
brisbane	rabbit
brisbane	sheep	8873	22420	https://www.mla.com.au/globalassets/mla-corporate/prices--markets/documents/trends--analysis/fast-facts--maps/2020/mla-sheep-numbers-map-2020-at-june-2019.pdf
