# Supplementary material for: Physiology and ecology combine to determine host and vector importance for Ross River virus
Source: eLife journal article supplement (doi:10.7554/elife.67018), 2021-08-20
Supplement: supp [file elife-67018-supp-v1.zip › elife_poa_e67018_Source_data_6.csv]

Reference	Vector	Area name	Habitat	Climatic Zone	human	dog	cat	horse	bird	possum	marsupial	flying_fox	cattle	pig	rabbit	sheep	goat	mixed	other	fox	rat	Total
Jansen	ae_lineatopennis	brisbane	Urban	Subtropical	0	1	0	0	0		0		0		0			0	0		0	1
Jansen	ae_notoscriptus	brisbane	Urban	Subtropical	3	1	0	0	2		5		0		0			0	0		0	11
Jansen	ae_procax	brisbane	Urban	Subtropical	0	2	0	0	0		0		0		0			0	0		0	2
Jansen	ae_vigilax	brisbane	Urban	Subtropical	9	3	0	4	1		2		0		0			1	2		2	24
Jansen	cq_linealis	brisbane	Urban	Subtropical	0	0	0	0	1		0		0		0			0	0		0	1
Jansen	cq_xanthogaster	brisbane	Urban	Subtropical	0	0	1	0	8		1		0		0			0	0		0	10
Jansen	cx_annulirostris	brisbane	Urban	Subtropical	12	7	0	3	9		19		3		1			0	1		3	58
Jansen	cx_orbostiensis	brisbane	Urban	Subtropical	1	0	0	0	0		0		0		0			0	0		0	1
Jansen	cx_quinquefasciatus	brisbane	Urban	Subtropical	0	0	0	0	2		0		0		0			0	0		0	2
Jansen	cx_sitiens	brisbane	Urban	Subtropical	1	0	0	0	2		0		0		0			0	0		0	3
Jansen	ma_uniformis	brisbane	Urban	Subtropical	0	1	0	0	0		0		0		0			0	0		0	1
Jansen	ve_funerea	brisbane	Urban	Subtropical	1	0	0	0	0		0		0		0			0	0		0	1
Jansen	ae_aegypti	cairns	Urban	Tropical	131	23	2	0	10		0		0		1			7	0		0	174
Jansen	ae_notoscriptus	cairns	Urban	Tropical	0	0	0	0	1		1		0		0			0	0		0	2
Jansen	ae_vigilax	cairns	Urban	Tropical	0	0	0	0	0		1		0		0			0	0		0	1
Jansen	cx_annulirostris	cairns	Urban	Tropical	3	5	0	1	6		14		0		0			0	1		4	34
Jansen	cx_halifaxii	cairns	Urban	Tropical	0	0	0	0	1		0		0		0			0	0		0	1
Jansen	cx_hilli	cairns	Urban	Tropical	3	1	0	0	0		0		0		0			0	0		0	4
Jansen	cx_pullus	cairns	Urban	Tropical	1	0	0	0	1		0		0		0			0	0		0	2
Jansen	cx_quinquefasciatus	cairns	Urban	Tropical	4	2	0	0	142		0		0		0			0	1		0	149
Jansen	cx_sitiens	cairns	Urban	Tropical	0	4	0	1	1		2		0		0			0	0		0	8
Jansen	ve_carmenti	cairns	Urban	Tropical	1	1	0	0	0		4		0		0			0	0		0	6
Ryan	ve_funerea	brisbane	Urban	Subtropical								16										16
Kay et al 2007	ae_notoscriptus	brisbane	Urban	Subtropical	32	62	3	0	27	42	0	4										170
Kay et al 2007	ae_procax	brisbane	Urban	Subtropical	3	15	0	1	8	0	0	0										27
Kay et al 2007	ae_vigilax	brisbane	Urban	Subtropical	18	41	2	16	39	12	0	1										129
Kay et al 2007	ae_vittiger	brisbane	Urban	Subtropical	0	1	0	3	0	1	0	0										5
Kay et al 2007	cx_annulirostris	brisbane	Urban	Subtropical	46	193	7	99	45	57	2	1										450
Kay et al 2007	cx_australicus	brisbane	Urban	Subtropical	0	1	0	5	14	2	0	0										22
Kay et al 2007	cx_quinquefasciatus	brisbane	Urban	Subtropical	0	3	3	11	7	1	0	0										25
Kay et al 2007	cx_sitiens	brisbane	Urban	Subtropical	1	2	0	2	9	0	0	0										14
Kay et al 2007	cq_linealis	brisbane	Urban	Subtropical	0	0	0	4	1	0	0	0										5
Kay et al 2007	cq_xanthogaster	brisbane	Urban	Subtropical	0	5	0	4	9	0	0	0										18
