# Supplementary material for: Physiology and ecology combine to determine host and vector importance for Ross River virus
Source: eLife journal article supplement (doi:10.7554/elife.67018), 2021-08-20
Supplement: supp [file elife-67018-supp-v1.zip › elife_poa_e67018_Source_data_7.csv]

host_species	prop_positive	reference	note
bird	0.289	elle raw data
cat	0.14	boyd & kay 2002
cattle	0.36	vale 1991
dog	0.237	boyd & kay 2002
flying_fox	0.172	elle raw data
horse	0.939	elle raw data
human	0.138	faddy et al 2015
macropod	0.439	potter et al 2014
possum	0.538	elle raw data	added brushtail and ringtail possums together
rabbit	0	marshall et al 1980
rat	0.02	doherty et al 1966
sheep	0.11	doherty et al 1966
bandicoot	0.25	vale 1991
