# Supplementary material for: Physiology and ecology combine to determine host and vector importance for Ross River virus
Source: eLife journal article supplement (doi:10.7554/elife.67018), 2021-08-20
Supplement: supp [file elife-67018-supp-v1.zip › elife_poa_e67018_Source_data_8.csv]

sp	site	count	source
ae_aegypti	cairns	304	jansen et al 2009
ae_aculeatus	brisbane	30	bcc
ae_alboscutellatus	brisbane	1	bcc
ae_alboscutellatus	cairns	40	steiger et al 2011
ae_alternans	brisbane	9	bcc
ae_alternans	cairns	2	steiger et al 2011
ae_burpengaryensis	brisbane	44	bcc
ae_kochi	cairns	13	steiger et al 2011
ae_lineatopennis	brisbane	2	bcc
ae_lineatopennis	brisbane	1	jansen et al 2009
ae_lineatopennis	cairns	11	steiger et al 2011
ae_notoscriptus	brisbane	575	bcc
ae_notoscriptus	cairns	22	steiger et al 2011
ae_notoscriptus	brisbane	16	jansen et al 2009
ae_notoscriptus	brisbane	170	kay et al 2007
ae_notoscriptus	cairns	2	jansen et al 2009
ae_procax	brisbane	6155	bcc
ae_procax	brisbane	27	kay et al 2007
ae_procax	brisbane	2	jansen et al 2009
ae_vigilax	cairns	2	steiger et al 2011
ae_vigilax	brisbane	7042	bcc
ae_vigilax	cairns	1	jansen et al 2009
ae_vigilax	brisbane	28	jansen et al 2009
ae_vigilax	brisbane	129	kay et al 2007
ae_vittiger	brisbane	5	kay et al 2007
ae_vittiger	brisbane	432	bcc
ae_wasselli	brisbane	41	bcc
an_annulipes	brisbane	278	bcc
an_annulipes	cairns	4	steiger et al 2011
an_atratipes	brisbane	27	bcc
an_bancroftii	brisbane	11	bcc
an_bancroftii	cairns	15	steiger et al 2011
an_farauti	cairns	34	steiger et al 2011
cq_crassipes	cairns	13	steiger et al 2011
cq_linealis	brisbane	5	kay et al 2007
cq_linealis	brisbane	3145	bcc
cq_linealis	brisbane	1	jansen et al 2009
cq_xanthogaster	brisbane	357	bcc
cq_xanthogaster	brisbane	10	jansen et al 2009
cq_xanthogaster	brisbane	18	kay et al 2007
cx_annulirostris	brisbane	10473	bcc
cx_annulirostris	brisbane	450	kay et al 2007
cx_annulirostris	cairns	320	steiger et al 2011
cx_annulirostris	brisbane	75	jansen et al 2009
cx_annulirostris	cairns	37	jansen et al 2009
cx_australicus	brisbane	1	bcc
cx_australicus	brisbane	22	kay et al 2007
cx_bitaeniorhynchus	cairns	4	steiger et al 2011
cx_cubiculi	cairns	10	steiger et al 2011
cx_gelidus	cairns	8	steiger et al 2011
cx_halifaxii	brisbane	7	bcc
cx_halifaxii	cairns	2	jansen et al 2009
cx_hilli	cairns	3	steiger et al 2011
cx_hilli	cairns	6	jansen et al 2009
cx_orbostiensis	brisbane	1230	bcc
cx_orbostiensis	brisbane	2	jansen et al 2009
cx_pullus	cairns	81	steiger et al 2011
cx_pullus	cairns	2	jansen et al 2009
cx_quinquefasciatus	brisbane	1	bcc
cx_quinquefasciatus	cairns	1	steiger et al 2011
cx_quinquefasciatus	brisbane	5	jansen et al 2009
cx_quinquefasciatus	brisbane	25	kay et al 2007
cx_quinquefasciatus	cairns	163	jansen et al 2009
cx_sitiens	brisbane	14	kay et al 2007
cx_sitiens	brisbane	166	bcc
cx_sitiens	cairns	14	steiger et al 2011
cx_sitiens	brisbane	5	jansen et al 2009
cx_sitiens	cairns	8	jansen et al 2009
ma_septempunctata	cairns	2	steiger et al 2011
ma_uniformis	brisbane	75	bcc
ma_uniformis	brisbane	1	jansen et al 2009
ma_uniformis	cairns	6	steiger et al 2011
mi_elegans	brisbane	1	bcc
to_speciosus	cairns	1	steiger et al 2011
ur_sp	cairns	1	steiger et al 2011
ve_carmenti	cairns	2	steiger et al 2011
ve_carmenti	cairns	6	jansen et al 2009
ve_funerea	brisbane	44	bcc
ve_funerea	brisbane	1	jansen et al 2009
ve_funerea	cairns	4	steiger et al 2011
ve_lineata	cairns	104	steiger et al 2011
ve_marks sp.52	brisbane	793	bcc
